# Supplementary material
Source: PubMed Central journal article supplement (PMC5749411)
Supplement: NIHMS920375-supplement-Supplemental_Figures_S1__S2___S3_and_Supplemental_Tables_S1___S2.pdf [file NIHMS920375-supplement-Supplemental_Figures_S1__S2___S3_and_Supplemental_Tables_S1___S2.pdf]

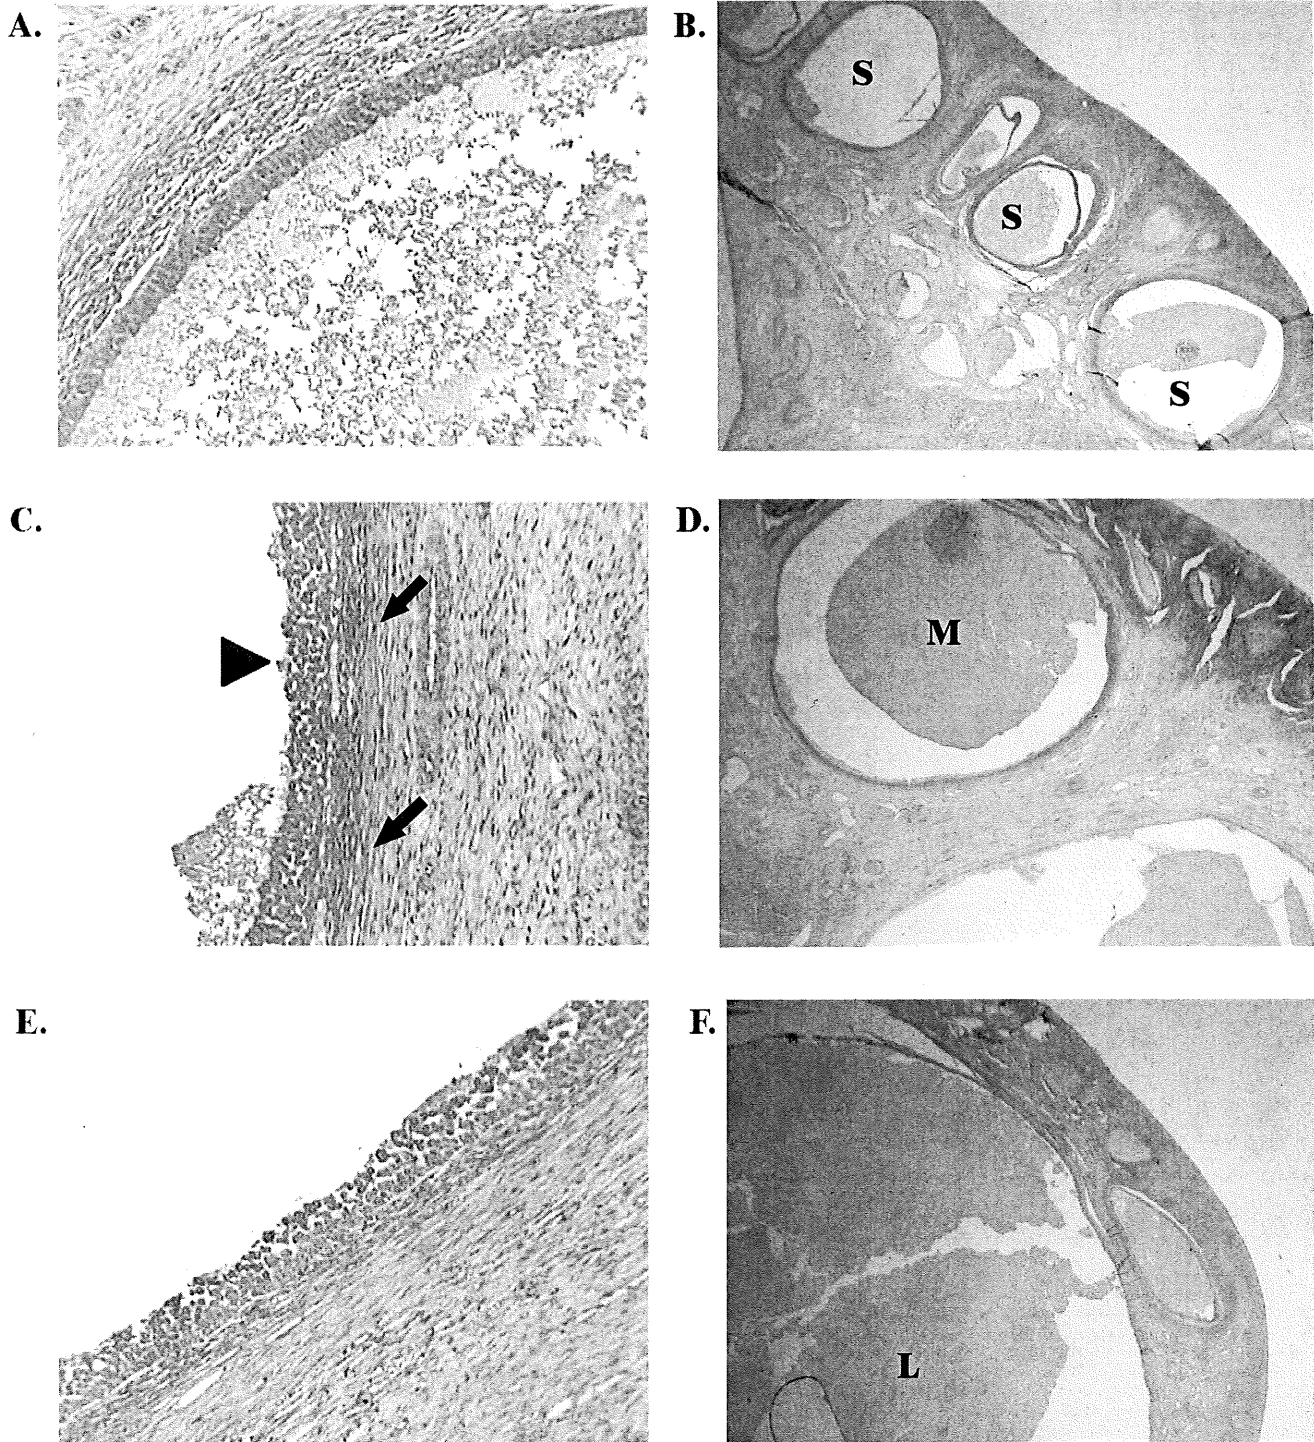

**Supplemental Figure S1** (color): Bovine antral follicle morphology for the (A, B) small (S), (C, D) medium (M) and (E, F) large (L) antral follicles. The theca cell layer is indicated with an arrow and granulosa cells with an arrowhead. The follicles A, C and E are at 100X magnification and follicles B, D and F are at 10X magnification. The histology represents the type of follicles used for analysis.

(A) Granulosa Cell Expression

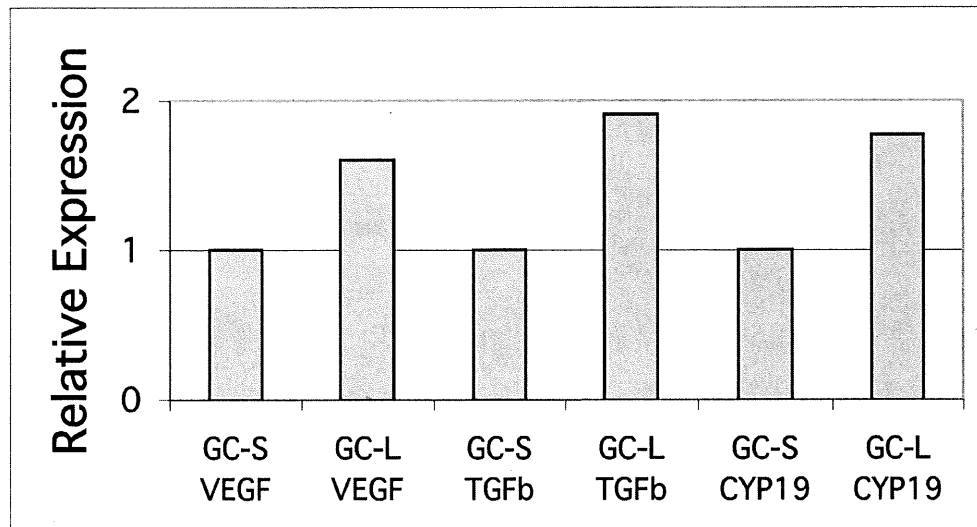

(B) Theca Cell Expression

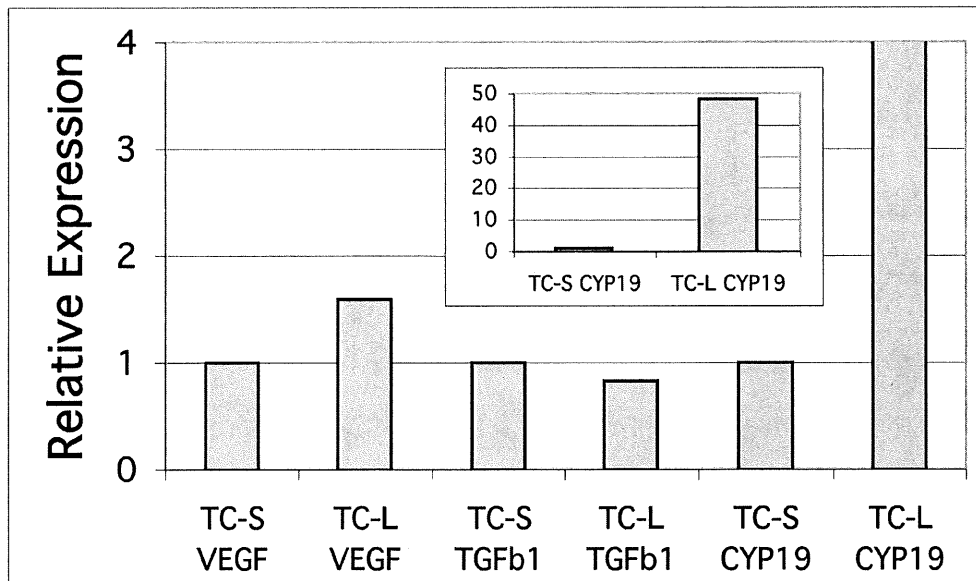

Supplemental Figure S2. Real-time PCR for VEGF, TGFbeta (TGFb) and aromatase (cyp19) in granulosa cell (GC) and theca cells (TC) from small (S) or large (L) follicles. Data was normalized with the constitutively expressed gene S2 and relative expression is presented in comparison with small follicle expression. The mean from pooled follicle samples and two independent sets of RNA are presented.

## Granulosa Cell Gene Clusters

A.

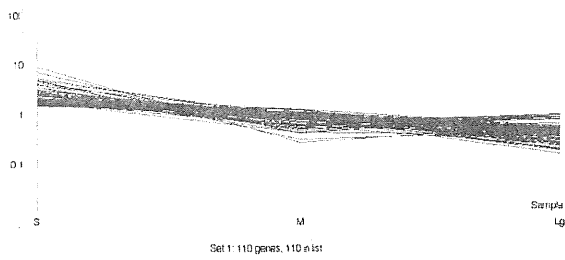

B.

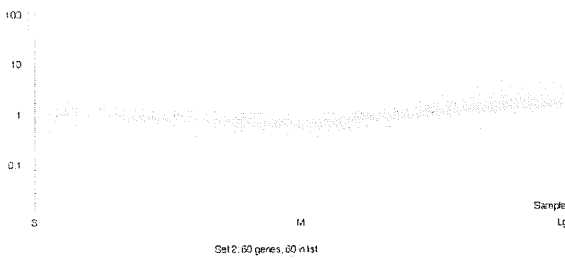

C.

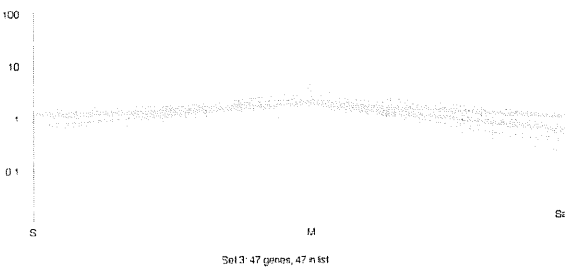

D.

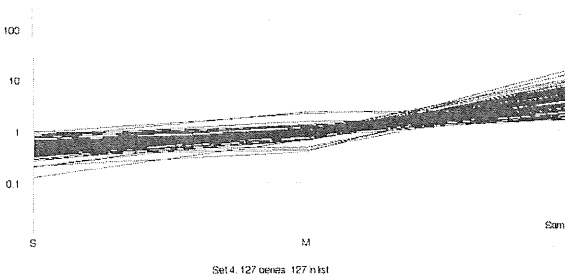

E.

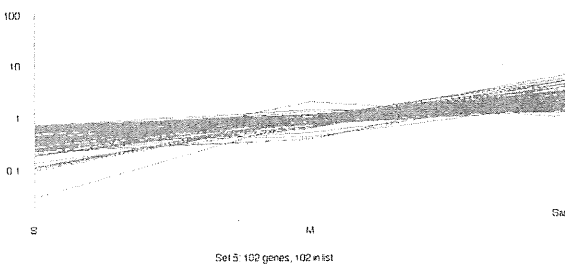

## Theca Cell Gene Clusters

F.

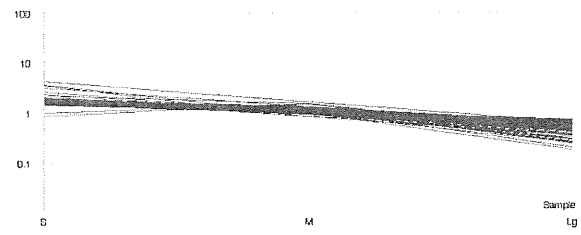

G.

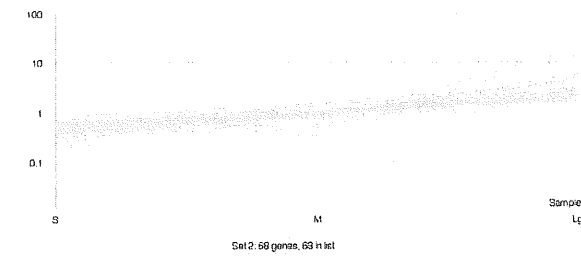

H.

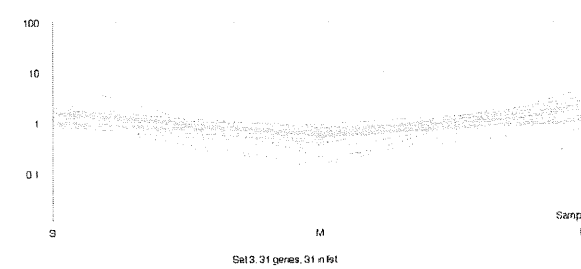

I.

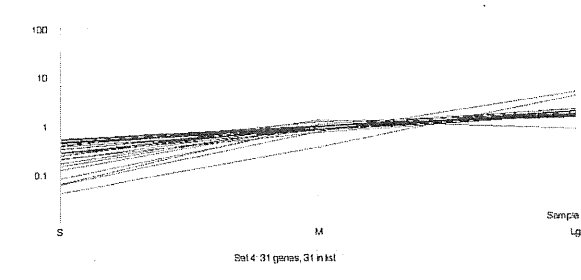

J.

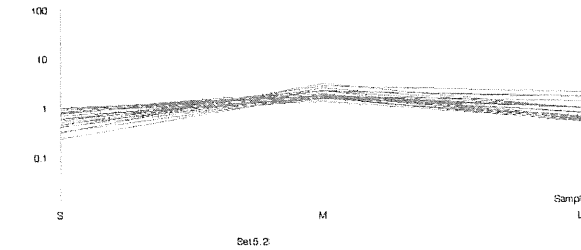

Supplemental Figure S3: Regulated gene clusters for granulosa cell (A-E) and theca cell (F-J) for small (S), medium (M) and large (Lg) follicle cell isolation. The number of genes are listed for each cluster set with relative expression presented.

Supplemental Table S1

## Bovine Granulosa Cell Regulated Genes

| Category/Gene Symbol      | S    | M    | L    | GenBank     | Description                                                                         |
|---------------------------|------|------|------|-------------|-------------------------------------------------------------------------------------|
| <b>Apoptosis</b>          |      |      |      |             |                                                                                     |
| <i>Casp4</i>              | 19   | 45   | 128  | NM_176638.2 | <b>caspace 4, apoptosis-related cysteine protease</b>                               |
| <i>Loc509600</i>          | 58   | 147  | 1013 | CB433486    | <b>similar to glycoprotein (transmembrane) nmb isoform a precursor-F49</b>          |
| <i>Loc525159</i>          | 29   | 50   | 259  | CK774234    | <b>similar to UNC-112 related protein 2 short form (LOC525159), predicted</b>       |
| ---                       | 103  | 64   | 33   | CB437307    | Transcribed locus, strongly similar to NP_005698.1 programmed cell death 7          |
| <i>Peg3</i>               | 417  | 105  | 188  | CB166978    | paternally expressed gene 3                                                         |
| <i>Mgc128158</i>          | 247  | 628  | 383  | BE751816    | similar to optineurin                                                               |
| <b>Cell Cycle</b>         |      |      |      |             |                                                                                     |
| <i>Aif1</i>               | 54   | 112  | 742  | NM_173985.2 | <b>allograft inflammatory factor 1</b>                                              |
| <i>Mgc127947</i>          | 469  | 274  | 89   | CB432953    | similar to Septin-4 (Peanut-like protein 2) (Brain protein H5) (MGC127947)          |
| <i>Loc512632</i>          | 57   | 122  | 38   | CK772111    | similar to suppression of tumorigenicity 5 (LOC512632), predicted                   |
| ---                       | 829  | 143  | 324  | AW463731    | Transcribed locus, moderately similar to XP_341967.1 similar to p57kip2             |
| <b>Development</b>        |      |      |      |             |                                                                                     |
| <i>Ncf1</i>               | 23   | 47   | 286  | NM_174119.2 | <b>neutrophil cytosolic factor 1 (47kDa, chronic granulomatous disease)</b>         |
| <i>Ncf2</i>               | 19   | 31   | 113  | NM_174120.2 | <b>neutrophil cytosolic factor 2 [65kD, human : chronic granulomatous</b>           |
| <i>Loc505318</i>          | 14   | 29   | 84   | CK957752    | <b>similar to Olfactomedin-like protein 3 precursor (HNOEL-iso) (hOLF44)</b>        |
| ---                       | 106  | 175  | 275  | CB438214    | <b>Transcribed locus, moderately similar to NP_150280.1 epithelial stromal</b>      |
| ---                       | 34   | 54   | 106  | CK772701    | <b>Canis familiaris similar to origin recognition complex subunit 5 isoform 1</b>   |
| ---                       | 18   | 49   | 530  | CK950711    | <b>Transcribed locus, moderately similar to NP_057703.1 placenta-specific</b>       |
| <i>Mog</i>                | 85   | 47   | 19   | CK941863    | Myelin oligodendrocyte glycoprotein                                                 |
| <i>Eed</i>                | 251  | 140  | 89   | BE722433    | Embryonic ectoderm development protein                                              |
| ---                       | 580  | 291  | 193  | CB455803    | Transcribed locus, moderately similar to NP_060019.1 upregulated                    |
| ---                       | 753  | 433  | 126  | CK772110    | Transcribed locus, strongly similar to XP_513604.1 HMT1 hnRNP                       |
| <i>Loc509575</i>          | 41   | 27   | 89   | CK957152    | similar to Junctional adhesion molecule-like precursor (Dendritic-cell              |
| ---                       | 50   | 32   | 77   | BE723501    | Transcribed locus, strongly similar to XP_511686.1 similar to unc-13                |
| <b>Electron Transport</b> |      |      |      |             |                                                                                     |
| <i>Cybb</i>               | 38   | 115  | 302  | NM_174035.2 | <b>cytochrome b-245, beta polypeptide [chronic granulomatous disease]</b>           |
| <i>Maob</i>               | 94   | 33   | 21   | CK775534    | Monoamine oxidase B                                                                 |
| <b>Ecm/ Cytoskeleton</b>  |      |      |      |             |                                                                                     |
| <i>Loc507126</i>          | 4    | 12   | 81   | CB435689    | <b>similar to basement membrane-induced gene (LOC507126), predicted</b>             |
| <i>Vcam1</i>              | 48   | 104  | 252  | AB052747.1  | <b>vascular cell adhesion molecule 1</b>                                            |
| <i>Tnfaip6</i>            | 31   | 50   | 342  | CB442867    | <b>Tumor necrosis factor, alpha-induced protein 6</b>                               |
| <i>Scin</i>               | 42   | 86   | 455  | NM_174177.2 | <b>scinderin</b>                                                                    |
| <i>Postn</i>              | 138  | 275  | 448  | BF231198    | <b>Periostin, osteoblast specific factor</b>                                        |
| <i>Lum</i>                | 278  | 525  | 875  | NM_173934.1 | <b>lumican</b>                                                                      |
| <i>Fn1</i>                | 27   | 49   | 93   | AF260304.1  | <b>fibronectin 1</b>                                                                |
| <i>Coro1a</i>             | 55   | 83   | 828  | NM_174521.2 | <b>coronin, actin binding protein, 1A</b>                                           |
| <i>Cald1</i>              | 59   | 124  | 220  | NM_174258.2 | <b>caldesmon, smooth muscle</b>                                                     |
| <i>Loc511869</i>          | 36   | 54   | 97   | CB456256    | <b>similar to transmembrane 4 superfamily member 5, transcript variant 1</b>        |
| <i>Loc505687</i>          | 187  | 391  | 625  | CK777314    | <b>similar to plastin 3, transcript variant 3</b>                                   |
| <i>Lrrc33</i>             | 7    | 23   | 94   | CK775761    | <b>leucine rich repeat containing 33 (LRRC33), NM_001034391.1</b>                   |
| <i>Itga1</i>              | 11   | 31   | 175  | BI681282    | <b>Integrin, alpha L (antigen CD11A (p180), lymphocyte function-associated</b>      |
| <i>Itgb2</i>              | 41   | 63   | 526  | NM_175781.1 | <b>Integrin, beta 2 (antigen CD18 subunit (p95), lymphocyte function-associated</b> |
| <i>Itga5</i>              | 69   | 109  | 189  | CK945847    | <b>Integrin, alpha 5 (fibronectin receptor, alpha polypeptide)</b>                  |
| <i>Loc511711</i>          | 14   | 34   | 175  | CK941183    | <b>similar to Fibroleukin precursor (Fibrinogen-like protein 2) (pT49),</b>         |
| <i>Acta1</i>              | 208  | 51   | 30   | NM_174225   | <b>actin, alpha 1, skeletal muscle</b>                                              |
| <i>Loc538668</i>          | 416  | 241  | 137  | BM480879    | <b>similar to transmembrane 4 superfamily member 9 (LOC538668)</b>                  |
| <i>Loc530050</i>          | 904  | 481  | 120  | CK972362    | <b>similar to smooth muscle myosin heavy chain 11 isoform SM1 (LOC530050)</b>       |
| <i>Loc511602</i>          | 122  | 59   | 31   | CB421028    | <b>similar to alpha 5 type IV collagen isoform 2, precursor</b>                     |
| <i>Loc537784</i>          | 85   | 48   | 22   | CK979703    | <b>similar to plakophilin 2 isoform 2a</b>                                          |
| <i>Itga2</i>              | 152  | 94   | 33   | L25886.1    | <b>integrin, alpha 2 (CD49B, alpha 2 subunit of VLA-2 receptor)</b>                 |
| <i>Mfap2</i>              | 516  | 144  | 308  | NM_174388.2 | <b>microfibrillar-associated protein 2</b>                                          |
| <i>F5</i>                 | 35   | 21   | 97   | NM_173879.2 | <b>coagulation factor V (proaccelerin, labile factor)</b>                           |
| <i>Des</i>                | 123  | 53   | 185  | CK948671    | <b>desmin</b>                                                                       |
| <i>Amelx</i>              | 107  | 69   | 167  | M63631.1    | <b>amelogenin (X chromosome)</b>                                                    |
| <i>Mcam</i>               | 172  | 267  | 97   | CK773680    | <b>melanoma adhesion molecule (MCAM), predicted</b>                                 |
| <i>Loc522371</i>          | 119  | 36   | 66   | CK769482    | <b>similar to tetraspanin 15, transcript variant 1 (LOC522371),</b>                 |
| ---                       | 53   | 35   | 80   | CK774709    | <b>Transcribed locus, strongly similar to NP_037373.1 formin homology 2 domain</b>  |
| <b>Golgi Apparatus</b>    |      |      |      |             |                                                                                     |
| <i>Loc520900</i>          | 15   | 33   | 233  | CK946016    | <b>similar to mannose receptor C1</b>                                               |
| <i>Loc537017</i>          | 19   | 66   | 123  | AW478320    | <b>similar to cytidine monophospho-N-acetylneuraminic acid hydroxylase</b>          |
| <i>Loc504309</i>          | 39   | 92   | 904  | CB459865    | <b>similar to C-type lectin domain family 2, member e (LOC504309)</b>               |
| <i>Loc533653</i>          | 9    | 130  | 33   | AV615565    | <b>similar to melanoma-associated chondroitin sulfate proteoglycan 4</b>            |
| <b>Growth Factors</b>     |      |      |      |             |                                                                                     |
| <i>Vegf</i>               | 44   | 83   | 134  | NM_174216.1 | <b>vascular endothelial growth factor</b>                                           |
| <i>Spp1</i>               | 627  | 1935 | 6851 | NM_174187.2 | <b>secreted phosphoprotein 1 [osteopontin, bone sialoprotein 1</b>                  |
| <i>Ifitm3</i>             | 1157 | 1803 | 3438 | CB443586    | <b>Interferon induced transmembrane protein 3 (1-8U)</b>                            |
| <i>Ccl8</i>               | 8    | 15   | 105  | NM_174007.1 | <b>chemokine (C-C motif) ligand 8</b>                                               |

Supplemental Table S1

## Bovine Granulosa Cell Regulated Genes

|                  |     |     |      |             |                                                                               |
|------------------|-----|-----|------|-------------|-------------------------------------------------------------------------------|
| <i>Ccl5</i>      | 3   | 22  | 427  | NM_175827.2 | chemokine (C-C motif) ligand 5                                                |
| <i>Ccl3l1</i>    | 50  | 77  | 305  | NM_174511.2 | chemokine (C-C motif) ligand 3-like 1                                         |
| <i>Ccl3l1</i>    | 49  | 101 | 271  | NM_174511.2 | Chemokine (C-C motif) ligand 3-like 1                                         |
| <i>Ccl2</i>      | 63  | 166 | 611  | NM_174006.2 | chemokine (C-C motif) ligand 2                                                |
| <i>Loc511671</i> | 109 | 176 | 1054 | CK770974    | similar to chemokine (C-X-C motif) ligand 16, transcript variant 1            |
| <i>Gmfg</i>      | 40  | 81  | 435  | CK771942    | glia maturation factor, gamma (GMFG), NM_001024537.1                          |
| <i>Loc511671</i> | 35  | 64  | 405  | BF775515    | similar to chemokine (C-X-C motif) ligand 16, transcript variant 3            |
| <i>Loc613811</i> | 37  | 72  | 115  | CK771033    | similar to stromal cell derived factor 1 isoform beta precursor               |
| <i>Loc414347</i> | 25  | 57  | 338  | CB463807    | putative MIP1-beta protein (LOC414347), predicted                             |
| ---              | 8   | 26  | 90   | CK772450    | Transcribed locus, moderately similar to NP_032740.2                          |
| <i>Igfbp2</i>    | 293 | 151 | 76   | NM_174555.1 | insulin-like growth factor binding protein 2, 36kDa                           |
| <i>Loc617915</i> | 101 | 46  | 20   | CK959718    | similar to Angiopoietin-4 precursor (ANG-4) (ANG-3) (LOC617915), predicted    |
| <i>Igfbp4</i>    | 74  | 259 | 167  | NM_174557.2 | insulin-like growth factor-binding protein 4                                  |
| <i>Igfbp3</i>    | 152 | 87  | 259  | NM_174556.1 | insulin-like growth factor binding protein 3                                  |
| <i>Igf1r</i>     | 119 | 185 | 38   | BM482617    | insulin-like growth factor 1 receptor                                         |
| <i>Gdf8</i>      | 81  | 13  | 34   | BF652431    | growth differentiation factor 8                                               |
| <i>Cxcr4</i>     | 96  | 53  | 460  | NM_174301.2 | chemokine (C-X-C motif) receptor 4                                            |
| <i>Tdgf1</i>     | 75  | 9   | 15   | CB468433    | teratocarcinoma-derived growth factor 1 (TDGF1)                               |
| <i>Loc504526</i> | 56  | 35  | 111  | CK771963    | similar to growth arrest-specific 6 (LOC504526), predicted                    |
| Hormones         | S   | M   | L    | GenBank     | Description                                                                   |
| <i>Ttr</i>       | 5   | 26  | 100  | AB009591.1  | transthyretin [prealbumin, amyloidosis type I]                                |
| <i>Amh</i>       | 645 | 373 | 186  | NM_173890.1 | anti-Mullerian hormone                                                        |
| <i>Gal</i>       | 98  | 10  | 15   | NM_173914.2 | galanin                                                                       |
| <i>Inhbb</i>     | 52  | 148 | 26   | NM_176852.1 | inhibin, beta B (activin AB beta polypeptide)                                 |
| Immune Response  | S   | M   | L    | GenBank     | Description                                                                   |
| <i>Fcgr1a</i>    | 38  | 78  | 322  | NM_174538.2 | Fc fragment of IgG, high affinity Ia, receptor for (CD64)                     |
| <i>C1qa</i>      | 85  | 154 | 1922 | CB168331    | complement component 1, q subcomponent, alpha polypeptide                     |
| <i>Loc509968</i> | 24  | 39  | 697  | CK771390    | similar to Complement C1q subcomponent, C chain precursor                     |
| <i>Loc507549</i> | 5   | 51  | 459  | CK771045    | similar to T-cell immunoglobulin and mucin domain containing                  |
| <i>Loc510910</i> | 5   | 17  | 95   | CK772231    | similar to CD84 antigen (leukocyte antigen) (LOC510910), predicted            |
| <i>Loc414345</i> | 9   | 20  | 117  | AY533858.1  | CD86                                                                          |
| <i>Mx2</i>       | 15  | 27  | 93   | NM_173941.2 | myxovirus (influenza virus) resistance 2 (mouse)                              |
| <i>Loc404109</i> | 25  | 46  | 83   | CK973343    | IgG2a heavy chain constant region                                             |
| <i>Igj</i>       | 20  | 30  | 218  | NM_175773.1 | immunoglobulin J chain                                                        |
| <i>Gnly</i>      | 21  | 33  | 289  | CB454206    | Granulysin                                                                    |
| <i>Gnly</i>      | 27  | 43  | 291  | CB435234    | granulysin (GNLY), predicted                                                  |
| <i>Defb1</i>     | 50  | 96  | 272  | NM_175703.2 | defensin, beta 1 (enteric)                                                    |
| <i>Cd86</i>      | 4   | 6   | 89   | AJ291475.1  | CD86 antigen                                                                  |
| <i>Cd45</i>      | 3   | 15  | 86   | BM363771    | membrane tyrosine phosphatase                                                 |
| <i>Cd3g</i>      | 11  | 19  | 139  | CB421951    | Antigen CD3G, gamma polypeptide                                               |
| <i>Cd14</i>      | 35  | 63  | 290  | NM_174008.1 | CD14 antigen                                                                  |
| <i>Bnbd-5</i>    | 4   | 128 | 454  | BM106372    | Neutrophil beta-defensin 5                                                    |
| <i>Bnbd-4</i>    | 84  | 216 | 421  | BM106372    | neutrophil beta-defensin 4                                                    |
| <i>Loc615930</i> | 172 | 356 | 1459 | CK771078    | similar to interferon gamma inducible protein 30, transcript variant 1        |
| <i>Loc504960</i> | 92  | 166 | 1824 | CK774183    | similar to CD68 antigen, transcript variant 2 (LOC504960)                     |
| <i>Loc509597</i> | 56  | 89  | 660  | AV617024    | similar to HLA class I histocompatibility antigen, A-11 alpha chain precursor |
| <i>Mgc128288</i> | 61  | 110 | 389  | CK776832    | similar to lymphocyte cytosolic protein 1 (predicted) (MGC128288)             |
| <i>Loc540824</i> | 70  | 115 | 177  | CF930575    | similar to B cell lymphoma/leukemia 10(B-cell CLL/lymphoma 10)                |
| <i>Bola-Dqa1</i> | 15  | 26  | 170  | D50454.1    | histocompatibility complex, class II, DQ alpha, type1 (BOLA-DQA1)             |
| <i>Loc617034</i> | 16  | 25  | 77   | BE755445    | similar to CD83 antigen precursor (Cell surface protein HB15)                 |
| <i>Fcnb</i>      | 25  | 55  | 382  | BF776071    | ficolin B (FCNB), NM_001010996.1                                              |
| <i>Loc525727</i> | 7   | 20  | 84   | B1849171    | similar to HLA class II histocompatibility antigen, DO alpha chain precursor  |
| <i>Loc510910</i> | 10  | 19  | 91   | BM089070    | similar to CD84 antigen (leukocyte antigen) (LOC510910), predicted            |
| <i>Loc513266</i> | 2   | 19  | 86   | BM365324    | similar to CD209 antigen (LOC513266), predicted                               |
| <i>Loc616818</i> | 35  | 65  | 726  | BM433957    | similar to Calgranulin A (Migration inhibitory factor-related protein 8)      |
| <i>Loc508386</i> | 16  | 43  | 329  | CB423230    | similar to B-lymphocyte activation marker BLAST-1 precursor                   |
| <i>Loc528593</i> | 10  | 37  | 612  | CB426639    | similar to CD5 antigen-like (LOC528593), predicted                            |
| <i>Bola-Dqa2</i> | 2   | 12  | 95   | CB444277    | mRNA for MHC class II DQA2                                                    |
| <i>Bola-Dmb</i>  | 15  | 30  | 263  | CK773078    | major histocompatibility complex, class II, DM beta-chain, expressed          |
| <i>Loc614262</i> | 29  | 66  | 368  | CK816899    | similar to V-set and immunoglobulin domain containing protein 4               |
| <i>Loc615744</i> | 12  | 27  | 141  | CK775301    | similar to Leukocyte specific transcript 1 protein (B144 protein)             |
| <i>Loc539605</i> | 36  | 65  | 271  | CK770528    | similar to properdin P factor, complement                                     |
| <i>Loc614044</i> | 15  | 28  | 110  | CK981542    | similar to Leukocyte immunoglobulin-like receptor subfamily A member          |
| <i>Nkg7</i>      | 15  | 28  | 121  | CK775256    | natural killer cell group 7 sequence (NKG7), NM_001035279.1                   |
| <i>Bla-Dqb</i>   | 8   | 16  | 481  | D37953.1    | MHC class II antigen, NM_001034668.1                                          |
| ---              | 40  | 66  | 223  | CK773094    | Transcribed locus, moderately similar to NP_004224.1 CD83 antigen             |
| <i>Loc537167</i> | 630 | 353 | 123  | CB464823    | similar to Core histone macro-H2A.2 (Histone macroH2A2) (mH2A2)               |
| <i>Loc511486</i> | 56  | 30  | 281  | CK960422    | similar to T-cell receptor alpha chain C region (LOC511486), predicted        |
| <i>Loc407206</i> | 14  | 9   | 80   | CK772383    | T cell receptor gamma chain variable region BVG7                              |
| <i>Cd3z</i>      | 28  | 16  | 135  | NM_174012.2 | antigen CD3Z, zeta polypeptide                                                |
| <i>Cd36</i>      | 297 | 193 | 825  | NM_174010.2 | CD36 antigen [collagen type I receptor, thrombospondin receptor]              |
| <i>Bola</i>      | 242 | 104 | 428  | AB008573.1  | MHC class I antigen (BoLA), predicted                                         |

Supplemental Table S1

## Bovine Granulosa Cell Regulated Genes

|                   |          |          |          |                |                                                                                          |
|-------------------|----------|----------|----------|----------------|------------------------------------------------------------------------------------------|
| <i>Loc510398</i>  | 34       | 21       | 137      | CK849860       | similar to Ig gamma-1 chain C region, membrane-bound form                                |
| <i>Loc617975</i>  | 44       | 131      | 27       | BI682571       | similar to Histone H1.0 (H1(O)) (Histone H1), transcript variant 1                       |
| <i>Agp</i>        | 106      | 15       | 37       | CB530461       | alpha-1 acid glycoprotein (AGP), predicted                                               |
| <i>Loc528926</i>  | 6        | 2        | 93       | CK958366       | similar to lymphocyte antigen 9 (LOC528926), predicted                                   |
| <i>Loc615844</i>  | 39       | 23       | 128      | CK943316       | similar to Endoglin precursor (CD105 antigen) (LOC615844), predicted                     |
| ---               | 42       | 119      | 79       | CK946910       | Transcribed locus, strongly similar to NP_005233.3 coagulation factor II                 |
| <b>Metabolism</b> | <b>S</b> | <b>M</b> | <b>L</b> | <b>GenBank</b> | <b>Description</b>                                                                       |
| <i>Loc512512</i>  | 10       | 19       | 100      | CK950056       | similar to Deoxyribonuclease gamma precursor (DNase gamma)                               |
| <i>Slc2a5</i>     | 29       | 70       | 248      | CK777297       | solute carrier family 2 (facilitated glucose/fructose transporter), member 5             |
| <i>Xdh</i>        | 7        | 26       | 133      | NM_173972.2    | xanthene dehydrogenase                                                                   |
| <i>Slc2b1</i>     | 6        | 20       | 96       | CK954377       | Organic anion transporting polypeptide 2b1                                               |
| <i>Slc2a5</i>     | 13       | 33       | 114      | AF308830.1     | solute carrier family 2 (facilitated glucose/fructose transporter), member 5             |
| <i>Rgn</i>        | 29       | 73       | 128      | NM_173957.2    | regucalcin (senescence marker protein-30)                                                |
| <i>Lyz</i>        | 29       | 49       | 755      | L19980.1       | lysozyme, macrophage                                                                     |
| <i>Hbb</i>        | 13       | 23       | 314      | NM_173917.1    | hemoglobin, beta [beta globin]                                                           |
| <i>Ggta1</i>      | 33       | 61       | 95       | NM_177511.1    | alpha-galactosyltransferase 1 (glycoprotein)                                             |
| <i>Fabp5</i>      | 42       | 109      | 770      | CK969096       | Fatty acid binding protein 5                                                             |
| <i>Fabp4</i>      | 111      | 213      | 2236     | NM_174314.2    | fatty acid-binding protein, adipocyte                                                    |
| <i>Ctss</i>       | 71       | 228      | 1513     | CK848234       | cathepsin S                                                                              |
| <i>Ctsc</i>       | 266      | 581      | 1640     | CK848620       | cathepsin C                                                                              |
| <i>Apn</i>        | 9        | 14       | 104      | CK769810       | Aminopeptidase N                                                                         |
| <i>Ang</i>        | 29       | 107      | 852      | NM_173891.1    | angiogenin                                                                               |
| <i>Aldh1a1</i>    | 36       | 62       | 319      | NM_174239.2    | aldehyde dehydrogenase 1 family, member A1                                               |
| <i>Oas1</i>       | 112      | 236      | 531      | CK960499       | 2'-5'-oligoadenylate synthetase 1 (OAS1), NM_178108                                      |
| <i>Loc509003</i>  | 49       | 81       | 149      | CB166446       | similar to Nucleobindin 2 precursor (DNA-binding protein NEFA)                           |
| <i>Loc511644</i>  | 71       | 119      | 191      | CB168603       | similar to Thiopurine S-methyltransferase (Thiopurine methyltransferase)                 |
| <i>Mgc128896</i>  | 14       | 24       | 119      | CK946616       | similar to GTPase, IMAP family member 7 (MGC128896), NM_001034771.1                      |
| <i>Loc532964</i>  | 10       | 20       | 120      | BF075879       | similar to myosin I F (LOC532964), predicted                                             |
| <i>Loc528288</i>  | 21       | 34       | 81       | BF601649       | similar to GTPase, IMAP family member 6 isoform 1 (LOC528288), predicted                 |
| <i>Loc512863</i>  | 15       | 24       | 89       | BF706229       | similar to sialic acid binding immunoglobulin-like lectin-like protein 1 isoform b       |
| <i>Loc512863</i>  | 13       | 21       | 175      | CB453710       | similar to sialic acid binding immunoglobulin-like lectin-like protein 1 I               |
| <i>Loc507865</i>  | 18       | 45       | 152      | CB166927       | similar to axotrophin, transcript variant 3 (LOC507865), predicted                       |
| <i>Loc512938</i>  | 44       | 71       | 953      | CB171496       | similar to ubiquitin D, transcript variant 2 (LOC512938), predicted                      |
| <i>Loc512867</i>  | 4        | 7        | 78       | CB420233       | similar to GTPase, IMAP family member 1 (LOC512867), predicted                           |
| <i>Loc510988</i>  | 17       | 28       | 320      | CK778198       | similar to GTPase, IMAP family member 7 (LOC510988), predicted                           |
| <i>Loc530077</i>  | 6        | 22       | 171      | CK770886       | similar to GTPase, IMAP family member 5, (LOC530077), predicted                          |
| <i>Loc540329</i>  | 40       | 72       | 121      | CB428002       | similar to protein phosphatase 1K (PP2C domain containing)                               |
| <i>Pla2g2d1</i>   | 10       | 17       | 171      | CB437801       | calcium-dependent phospholipase A2 PLA2G2D1 (PLA2G2D1)                                   |
| <i>Loc505394</i>  | 9        | 16       | 135      | CB530133       | similar to Apolipoprotein A-II precursor (Apo-AII) (Apo-AII) (LOC505394)                 |
| <i>Loc525813</i>  | 29       | 54       | 129      | CK777442       | similar to malic enzyme 3, NADP(+)-dependent, mitochondrial (LOC525813), pred            |
| <i>Loc507597</i>  | 17       | 37       | 119      | CK775223       | similar to N-acetylneuraminidase pyruvate lyase (LOC507597), predicted                   |
| <i>Ace2</i>       | 16       | 32       | 83       | CK948184       | angiotensin I converting enzyme 2 precursor                                              |
| <i>Loc518062</i>  | 34       | 59       | 123      | CK771026       | similar to Putative transporter C20orf59 (LOC518062), predicted                          |
| <i>Birc4bp</i>    | 27       | 50       | 132      | CK770588       | XIAP associated factor-1 (BIRC4BP), NM_001035075.1                                       |
| <i>Loc512486</i>  | 27       | 63       | 189      | CK957199       | similar to Interferon-induced guanylate-binding protein 1 (GTP-binding protein 1)        |
| <i>Pc</i>         | 313      | 136      | 85       | NM_177946.2    | pyruvate carboxylase                                                                     |
| <i>Ltf</i>        | 1434     | 281      | 133      | NM_180998.2    | lactoferrin [lactotransferrin]                                                           |
| <i>Phgdh</i>      | 613      | 298      | 185      | CK771294       | phosphoglycerate dehydrogenase (PHGDH), NM_001035017.1                                   |
| <i>Loc511449</i>  | 253      | 168      | 103      | AW356212       | similar to 5-nucleotidase, cytosolic III, transcript variant 8 (LOC511449), predic       |
| <i>Loc510504</i>  | 341      | 222      | 81       | CK940736       | similar to glycosyltransferase-like 1B transcript variant 2 (LOC510504), predict         |
| <i>Loc510372</i>  | 114      | 75       | 43       | CK776058       | similar to importin 4, transcript variant 5 (LOC510372), predicted                       |
| <i>Loc504250</i>  | 83       | 40       | 20       | AV589549       | similar to Dihydropyrimidinase-related protein 1 (DRP-1) (Collapsin response me          |
| <i>Cpxm</i>       | 95       | 57       | 37       | BE754081       | carboxypeptidase X (CPXM), NM_001015642.1                                                |
| <i>Loc521064</i>  | 124      | 55       | 22       | CB464666       | similar to proline rich 6 (LOC521064), predicted                                         |
| <i>Loc614203</i>  | 92       | 40       | 10       | CK769376       | similar to UDP-N-acetyl-alpha-D-galactosamine:polypeptide N-acetylgalactosaminyltran     |
| <i>Ddo</i>        | 115      | 35       | 9        | NM_173908.2    | D-aspartate oxidase                                                                      |
| ---               | 434      | 667      | 250      | CK848432       | Transcribed locus, moderately similar to NP_056174.1 solute carrier family 39 (zinc tran |
| <i>Slc11a1</i>    | 24       | 15       | 472      | NM_174652.2    | solute carrier family 11 (proton-coupled divalent metal ion transporters), member 1      |
| <i>Scd</i>        | 1374     | 2139     | 787      | AY241933.1     | stearoyl-coenzyme A desaturase                                                           |
| <i>Pnmt</i>       | 106      | 15       | 43       | NM_177505.2    | phenylethanolamine N-methyltransferase                                                   |
| <i>Kpnb2</i>      | 114      | 287      | 183      | AY298813.1     | karyopherin (importin) beta 2                                                            |
| <i>Ece1</i>       | 230      | 352      | 144      | Z35306.1       | endothelin converting enzyme 1                                                           |
| <i>Ca2</i>        | 448      | 270      | 888      | NM_178572.2    | carbonic anhydrase II                                                                    |
| <i>Ahsg</i>       | 15       | 9        | 81       | CB537901       | alpha-2-HS-glycoprotein                                                                  |
| <i>Loc511053</i>  | 76       | 278      | 146      | CK770053       | similar to solute carrier family 27 member 3, transcript variant 1                       |
| <i>Loc512468</i>  | 344      | 731      | 214      | CB444175       | similar to Glutamate--cysteine ligase catalytic subunit                                  |
| <i>Loc540066</i>  | 589      | 1046     | 331      | CK769427       | similar to carbohydrate (N-acetylgalactosamine 4-O) sulfotransferase 8,                  |
| <i>Loc514105</i>  | 69       | 236      | 141      | CB538971       | similar to Carboxypeptidase D precursor (Metalloproteinase D)                            |
| <i>Loc512464</i>  | 96       | 146      | 55       | CB530449       | similar to solute carrier family 11 (proton-coupled divalent metal ion                   |
| <i>Loc515918</i>  | 73       | 141      | 42       | CK976676       | similar to carbonic anhydrase VIII (LOC515918), predicted                                |
| <i>Mgc128502</i>  | 55       | 35       | 147      | AU097767       | similar to tRNA splicing 2 phosphotransferase 1 (MGC128502)                              |
| <i>Cacna1h</i>    | 134      | 37       | 57       | AW481855       | calcium channel, voltage-dependent, alpha 1H subunit (CACNA1H)                           |
| <i>Loc613869</i>  | 52       | 30       | 88       | BF651608       | similar to arachidonate 5-lipoxygenase activating protein                                |

Supplemental Table S1

## Bovine Granulosa Cell Regulated Genes

|                              |          |          |          |                |                                                                              |
|------------------------------|----------|----------|----------|----------------|------------------------------------------------------------------------------|
| <i>Loc511617</i>             | 11       | 6        | 82       | BI775718       | similar to GTPase, IMAP family member 5 (LOC511617), predicted               |
| <i>Loc514346</i>             | 38       | 19       | 233      | BM251912       | similar to serine dehydratase (LOC514346), predicted                         |
| <i>Loc515161</i>             | 76       | 20       | 36       | CF615708       | similar to Sodium/potassium-transporting ATPase alpha-2 chain precursor      |
| <i>Loc528735</i>             | 64       | 35       | 99       | CK770139       | similar to S-100 protein, alpha chain (S100 calcium-binding protein A1)      |
| <i>Loc505721</i>             | 126      | 16       | 38       | CK849612       | similar to regulator of telomere elongation helicase 1 isoform 2             |
| <i>Loc514105</i>             | 94       | 309      | 203      | AW465202       | similar to Carboxypeptidase D precursor (Metalloproteinase D)                |
| <i>Hmox1</i>                 | 1108     | 721      | 2719     | CK770847       | heme oxygenase (decyclizing) 1 (HMOX1), NM_001014912.1                       |
| <i>Cyp51</i>                 | 124      | 304      | 202      | CK961820       | cytochrome P450, family 51, subfamily A, polypeptide 1 (CYP51)               |
| ---                          | 102      | 67       | 215      | CK769509       | Transcribed locus, moderately similar to NP_057457.1 WW domain containing    |
| ---                          | 49       | 25       | 89       | CB464568       | Transcribed locus, moderately similar to NP_002601.1 pyruvate dehydrogenase  |
| <b>Protease</b>              | <b>S</b> | <b>M</b> | <b>L</b> | <b>GenBank</b> | <b>Description</b>                                                           |
| <i>Loc617313</i>             | 10       | 17       | 182      | CK776010       | similar to Granzyme H precursor (Cytotoxic T-lymphocyte proteinase)          |
| <i>Serp1nb2</i>              | 675      | 2271     | 4058     | AF416234.1     | serine (or cysteine) proteinase inhibitor, clade B (ovalbumin), member 2     |
| <i>Serp1nb2</i>              | 17       | 71       | 173      | AF416234.1     | serine (or cysteine) proteinase inhibitor, clade B (ovalbumin), member 2     |
| <i>Loc404103</i>             | 45       | 153      | 532      | NM_205786.1    | spleen trypsin inhibitor                                                     |
| <i>Serp1g1</i>               | 158      | 15       | 80       | NM_174821.2    | serine (or cysteine) proteinase inhibitor, clade G (C1 inhibitor), member 1, |
| <i>Serp1a3 /// Loc49720:</i> | 386      | 1144     | 680      | CB530241       | serine (or cysteine) proteinase inhibitor, clade A                           |
| <b>Receptors</b>             | <b>S</b> | <b>M</b> | <b>L</b> | <b>GenBank</b> | <b>Description</b>                                                           |
| <i>Il2rg</i>                 | 24       | 36       | 223      | NM_174359.1    | interleukin 2 receptor, gamma                                                |
| <i>Loc509418</i>             | 11       | 39       | 250      | CB446844       | similar to colony stimulating factor 1 receptor precursor,                   |
| <i>Loc529800</i>             | 20       | 36       | 83       | CK769532       | similar to ephrin receptor EphB6 precursor (LOC529800), predicted            |
| <i>Loc505292</i>             | 9        | 17       | 114      | CK776540       | G-protein-coupled receptor GPR34                                             |
| <i>Olr1</i>                  | 197      | 510      | 1243     | NM_174132.2    | oxidised low density lipoprotein (lectin-like) receptor 1                    |
| <i>oc407150 /// Loc4080:</i> | 459      | 256      | 129      | AJ488553.1     | insulin receptor /// insulin receptor                                        |
| ---                          | 69       | 40       | 128      | CB421632       | Transcribed locus, moderately similar to NP_058934.1 vasoactive              |
| <b>Signaling</b>             | <b>S</b> | <b>M</b> | <b>L</b> | <b>GenBank</b> | <b>Description</b>                                                           |
| <i>Loc538835</i>             | 15       | 30       | 140      | CB429928       | similar to Rho GTPase activating protein 30 isoform 1, transcript            |
| <i>S100a12</i>               | 75       | 139      | 1289     | NM_174651.1    | S100 calcium binding protein A12 (calgranulin C)                             |
| <i>Loc507427</i>             | 20       | 38       | 109      | CK848566       | similar to receptor-interacting serine-threonine kinase 3                    |
| <i>Loc510102</i>             | 54       | 99       | 586      | BP106985       | similar to retinoic acid receptor responder (tazarotene induced)             |
| <i>Loc507329</i>             | 8        | 18       | 118      | CK963233       | similar to SH2 containing inositol phosphatase isoform b                     |
| <i>Mgc128725</i>             | 3        | 8        | 95       | CK952709       | similar to SH2 domain protein 1A (MGC128725), NM_001034733.1                 |
| <i>Loc541093</i>             | 34       | 55       | 103      | CK846284       | similar to neurexophilin 3 (LOC541093), predicted                            |
| <i>Tlr2</i>                  | 27       | 54       | 251      | NM_174197.2    | toll-like receptor 2                                                         |
| <i>Tgfb1</i>                 | 66       | 107      | 232      | BM251237       | transforming growth factor, beta 1 (Camurati-Engelmann disease)              |
| <i>Rap1a</i>                 | 90       | 139      | 255      | NM_174448.2    | RAP1A, member of RAS oncogene family                                         |
| <i>Adcy7</i>                 | 19       | 35       | 149      | NM_174230.2    | adenylate cyclase 7                                                          |
| <i>Loc510549</i>             | 52       | 80       | 163      | CK849639       | similar to Ras association domain family 4 isoform a, transcript variant     |
| <i>Cd53</i>                  | 31       | 89       | 508      | CK849015       | CD53 antigen (CD53), NM_001034232.1                                          |
| <i>Ms4a7</i>                 | 14       | 23       | 153      | AV598285       | membrane-spanning 4-domains, subfamily A, member 7 (MS4A7)                   |
| <i>Loc618035</i>             | 39       | 67       | 103      | AW336381       | similar to RAB27A protein (LOC618035), predicted                             |
| <i>Fes</i>                   | 6        | 14       | 93       | BF602813       | feline sarcoma viral (v-fes) oncogene (FES), predicted                       |
| <i>Loc540836</i>             | 15       | 53       | 416      | CB170921       | similar to Regulator of G-protein signaling 1 (RGS1) (Early response protein |
| <i>Loc532569</i>             | 8        | 21       | 178      | CB417812       | similar to Calgranulin B (Migration inhibitory factor-related protein 14)    |
| <i>C3</i>                    | 8        | 19       | 165      | CB461274       | complement component 3 (C3), predicted                                       |
| <i>Loc534996</i>             | 10       | 19       | 82       | CF764664       | similar to Yamaguchi sarcoma viral (v-yes-1) oncogene homolog                |
| <i>Loc514076</i>             | 8        | 21       | 80       | CK769662       | similar to Complement factor B precursor (C3/C5 convertase)                  |
| <i>Loc514616</i>             | 19       | 30       | 128      | CK770042       | similar to docking protein 2 isoform A (LOC514616), predicted                |
| <i>Loc513244</i>             | 13       | 24       | 93       | CK846023       | similar to Lymphocyte cytosolic protein 2 (SH2 domain-containing             |
| <i>Mgc128111</i>             | 14       | 26       | 244      | CB464071       | similar to SAM-domain protein SAMSN-1 (SAM domain, SH3 domain                |
| <i>Loc534171</i>             | 15       | 31       | 253      | CK970569       | similar to SAM-domain protein SAMSN-1 (SAM domain, SH3 domain                |
| <i>Loc512312</i>             | 13       | 35       | 157      | CK849706       | src homology 2 domain-containing phosphatase-1, (LOC512312), predicted       |
| ---                          | 24       | 76       | 200      | CB430850       | Transcribed locus, strongly similar to NP_005019.2                           |
| ---                          | 31       | 99       | 350      | CB468195       | Transcribed locus, strongly similar to NP_005019.2                           |
| ---                          | 15       | 40       | 370      | CK956156       | Transcribed locus, moderately similar to XP_514081.1                         |
| ---                          | 335      | 218      | 107      | CK729758       | Transcribed locus, strongly similar to NP_037407.3 ankyrin repeat            |
| <i>Stc1</i>                  | 1286     | 821      | 345      | NM_176669.2    | stanniocalcin 1                                                              |
| <i>Loc506627</i>             | 505      | 318      | 183      | AW336328       | similar to Dickkopf-related protein 3 precursor (Dkk-3)                      |
| <i>Ras11b</i>                | 228      | 113      | 29       | CK977446       | RAS-like family 11, member B (RASL11B), NM_001015635.1                       |
| <i>Loc539768</i>             | 232      | 136      | 73       | CK776838       | similar to phosphodiesterase 8B isoform 1 (LOC539768), predicted             |
| <i>Loc539201</i>             | 385      | 107      | 57       | CB437887       | similar to Diphosphoinositol polyphosphate phosphohydrolase                  |
| <i>Loc532856</i>             | 89       | 54       | 29       | AV600334       | similar to ankyrin repeat domain 11 (LOC532856), predicted                   |
| <i>Loc516303</i>             | 122      | 70       | 27       | CB456788       | similar to mitogen-inducible gene 6 protein (LOC516303), predicted           |
| ---                          | 125      | 55       | 22       | CK772945       | Transcribed locus, strongly similar to XP_511363.1 similar to TNF            |
| <i>Loc511989</i>             | 53       | 15       | 104      | CK948223       | similar to FYVE, RhoGEF and PH domain containing 2                           |
| <i>Mgat4a</i>                | 45       | 23       | 105      | CK849000       | Mannosyl (alpha-1,3-)-glycoprotein beta-1,                                   |
| <i>Mgc126900</i>             | 31       | 20       | 96       | AW289293       | similar to Proto-oncogene tyrosine-protein kinase LCK                        |
| <i>Loc504585</i>             | 59       | 89       | 34       | BI847915       | similar to Sperm-associated antigen 5 (Astrin)                               |
| <i>Ppp1r1b</i>               | 95       | 3        | 7        | NM_174647.2    | protein phosphatase 1, regulatory (inhibitor) subunit 1B                     |
| <i>Lrp8</i>                  | 36       | 391      | 243      | CB166058       | low density lipoprotein receptor-related protein 8                           |
| <i>Cart</i>                  | 1805     | 129      | 292      | BM288295       | Cocaine and amphetamine responsive transcript                                |

Supplemental Table S1

## Bovine Granulosa Cell Regulated Genes

|                         |          |          |          |                |                                                                           |
|-------------------------|----------|----------|----------|----------------|---------------------------------------------------------------------------|
| <i>Lgals9</i>           | 155      | 99       | 259      | CK849539       | lectin, galactoside-binding, soluble, 9 (galectin 9)                      |
| <i>Loc614644</i>        | 148      | 47       | 89       | CK773279       | similar to BMP and activin membrane-bound inhibitor homolog precursor     |
| <i>Loc514282</i>        | 20       | 11       | 82       | AV594085       | similar to Apolipoprotein-L3 (Apolipoprotein L-III) (ApoL-III)            |
| <i>Loc616759</i>        | 57       | 103      | 35       | CB439542       | similar to FAS-associated factor 1 (FAF1 protein) (LOC616759), predicted  |
| <i>Loc533332</i>        | 28       | 122      | 67       | CF765405       | similar to RAB38 (LOC533332), predicted                                   |
| ---                     | 49       | 20       | 173      | CB464749       | Transcribed locus, strongly similar to NP_005864.1 regulator of G-protein |
| <b>Steroidogenesis</b>  | <b>S</b> | <b>M</b> | <b>L</b> | <b>GenBank</b> | <b>Description</b>                                                        |
| <i>Cyp19</i>            | 120      | 2467     | 2477     | NM_174305.1    | cytochrome P450, subfamily XIX (aromatase)                                |
| <i>Cyp17</i>            | 33       | 70       | 139      | NM_174304.1    | cytochrome P450, subfamily XVII                                           |
| <i>Ptges</i>            | 187      | 24       | 99       | NM_174443.2    | prostaglandin E synthase                                                  |
| <b>Transcription</b>    | <b>S</b> | <b>M</b> | <b>L</b> | <b>GenBank</b> | <b>Description</b>                                                        |
| <i>Snai2</i>            | 163      | 274      | 518      | CK846343       | Snail homolog 2 (Drosophila)                                              |
| <i>Ostf1</i>            | 224      | 378      | 721      | NM_174409.2    | osteoclast stimulating factor 1                                           |
| <i>Loc540789</i>        | 50       | 81       | 127      | CK964890       | similar to poly (ADP-ribose) polymerase family, member 14                 |
| <i>Loc617673</i>        | 5        | 22       | 145      | CB420213       | similar to Vav proto-oncogene (LOC617673), predicted                      |
| <i>Loc507100</i>        | 28       | 50       | 234      | CB431054       | similar to Transcription factor PU.1 (31 kDa transforming protein)        |
| <i>Loc617628</i>        | 4        | 11       | 77       | CB440072       | similar to ATF-like basic leucine zipper transcription factor B-ATF       |
| <i>Irf5</i>             | 33       | 57       | 228      | CK771035       | interferon regulatory factor 5 isoform b (IRF5), NM_001035465.1           |
| <i>Loc515564</i>        | 255      | 163      | 101      | CK776693       | similar to Zinc finger protein 197 (ZnF20), transcript variant 5          |
| <i>Loc533826</i>        | 295      | 194      | 108      | BP106791       | similar to Cullin-associated NEDD8-dissociated protein 2                  |
| <i>Loc510050</i>        | 593      | 365      | 242      | CB420255       | similar to TG-interacting factor isoform a (LOC510050), predicted         |
| <i>Loc534213</i>        | 173      | 100      | 61       | CK834868       | similar to zinc finger protein 521 isoform 1 (LOC534213), predicted       |
| <i>Loc527574</i>        | 293      | 122      | 69       | CK770186       | similar to sal-like 2 (LOC527574), predicted                              |
| <i>Loc516156</i>        | 160      | 97       | 53       | CK729854       | similar to Zinc finger protein 331 (Zinc finger protein 463)              |
| <i>Loc506114</i>        | 80       | 53       | 31       | CK769584       | similar to Transcription factor Dp-2 (E2F dimerization partner 2)         |
| <i>Loc514174</i>        | 135      | 56       | 31       | CK775981       | similar to cytoplasmic polyadenylation element binding protein 1          |
| <i>Loc521364</i>        | 133      | 47       | 17       | CK775529       | similar to Frizzled 9 precursor (Frizzled-9) (Fz-9) (mFz9) (mFz3)         |
| <i>Rpl6</i>             | 251      | 144      | 402      | AV601026       | Ribosomal protein L6                                                      |
| <i>Rpl24</i>            | 327      | 515      | 141      | CK775524       | Ribosomal protein L24                                                     |
| <i>Foxl2</i>            | 73       | 124      | 36       | AY116404.1     | forkhead box L2                                                           |
| <i>Loc514246</i>        | 467      | 298      | 786      | BE664618       | similar to Transcription factor jun-B (LOC514246), predicted              |
| ---                     | 175      | 325      | 78       | X15543.1       | RF-36-DNA-binding protein                                                 |
| <i>Loc617975</i>        | 75       | 155      | 41       | CF765300       | similar to Histone H1.0 (H1(O)) (Histone H1), transcript variant 1        |
| <i>Mgc128169</i>        | 67       | 102      | 26       | AW447459       | similar to zinc finger protein 36 (MGC128169), NM_001035368.1             |
| <i>Loc520842</i>        | 39       | 23       | 77       | CB165826       | similar to Kruppel-like factor 4 (Epithelial zinc-finger protein EZF)     |
| <i>Loc541088</i>        | 73       | 144      | 47       | CB444034       | similar to BCoR protein (BCL-6 corepressor), transcript variant 3         |
| <i>Loc614909</i>        | 65       | 41       | 184      | CK958835       | similar to interferon regulatory factor 8 (LOC614909), predicted          |
| <i>Loc617975</i>        | 171      | 281      | 100      | CB420587       | similar to Histone H1.0 (H1(O)) (Histone H1), transcript variant 1        |
| ---                     | 75       | 28       | 115      | AW464305       | Transcribed locus, strongly similar to NP_084520.2 immediate early        |
| <b>Translation</b>      | <b>S</b> | <b>M</b> | <b>L</b> | <b>GenBank</b> | <b>Description</b>                                                        |
| <i>Rnase6</i>           | 43       | 119      | 1172     | NM_174594.2    | ribonuclease k6                                                           |
| <b>Unknown Function</b> | <b>S</b> | <b>M</b> | <b>L</b> | <b>GenBank</b> | <b>Description</b>                                                        |
| <i>Loc404122</i>        | 701      | 1086     | 1709     | CK978279       | Hypothetical protein LOC404122                                            |
| <i>Loc507138</i>        | 355      | 1027     | 1856     | CB456756       | similar to putative ISG12(a) protein (LOC507138), predicted               |
| <i>Loc512361</i>        | 129      | 205      | 1337     | CK774666       | similar to Lysosomal-associated multitransmembrane protein                |
| <i>Icam3</i>            | 18       | 32       | 276      | NM_174349.1    | intercellular adhesion molecule 3                                         |
| <i>Evi2b</i>            | 10       | 15       | 81       | CB538192       | Ecotropic viral integration site 2B                                       |
| <i>Loc504773</i>        | 66       | 142      | 1445     | CB530693       | regakine-1 protein (LOC504773), NM_001034220.1                            |
| <i>Mgc127454</i>        | 18       | 35       | 195      | AW658502       | similar to Hematopoietic lineage cell specific protein                    |
| <i>Loc507801</i>        | 32       | 50       | 76       | BF039068       | similar to splicing factor, arginine/serine-rich 12                       |
| <i>Loc617446</i>        | 25       | 38       | 191      | BF601096       | hypothetical protein LOC617446 (LOC617446), predicted                     |
| <i>Mgc127869</i>        | 10       | 15       | 82       | CB424390       | similar to testis expressed sequence 12 (MGC127869), NM_001034263.1       |
| <i>Plac8</i>            | 2        | 7        | 132      | CB425639       | placenta-specific 8 (PLAC8), NM_001025325.1                               |
| <i>Loc513939</i>        | 28       | 51       | 109      | CK846668       | similar to Gasdermin domain containing protein 1 (FKSG10 protein)         |
| <i>Fij14213</i>         | 30       | 53       | 108      | CK771521       | hypothetical protein FLJ14213                                             |
| <i>Loc510773</i>        | 7        | 16       | 97       | CK848741       | similar to CG8312-PA, isoform A (LOC510773), predicted                    |
| <i>Loc493778</i>        | 4035     | 2574     | 1661     | CB532123       | Up-regulated during vascular calcification                                |
| <i>Loc513556</i>        | 772      | 435      | 259      | CB444311       | similar to CG12093-PA (LOC513556), predicted                              |
| <i>Mgc128811</i>        | 2000     | 1225     | 670      | CB168739       | similar to Protein C10orf58 precursor (MGC128811), NM_001034599.1         |
| <i>Loc617091</i>        | 1410     | 847      | 445      | CB421708       | similar to Ectoderm-neural cortex-1 protein (ENC-1)                       |
| <i>Loc515133</i>        | 2483     | 766      | 435      | CK776308       | similar to esophageal cancer related gene 4 protein                       |
| <i>Loc511591</i>        | 691      | 326      | 191      | CK951333       | similar to sortilin 1 preproprotein (LOC511591), predicted                |
| <i>Loc525051</i>        | 160      | 88       | 52       | CK776192       | similar to bromodomain containing protein 3 (LOC525051), predicted        |
| <i>Loc540275</i>        | 277      | 183      | 54       | CA035043       | similar to Chordin-like protein 1 precursor (Neuralin) (Ventroptin)       |
| <i>Loc538109</i>        | 91       | 48       | 24       | CB455153       | similar to CG9913-PB, isoform B (LOC538109),                              |
| <i>C20orf55</i>         | 78       | 41       | 14       | CK729276       | chromosome 20 open reading frame 55 (C20orf55), NM_001014961.1            |
| <i>Trb2</i>             | 1394     | 3293     | 2180     | CK982437       | TRB-2 protein                                                             |
| <i>Loc614391</i>        | 133      | 398      | 242      | CK952483       | similar to Arg/Abl-interacting protein 2 isoform 1, transcript variant 4  |
| <i>Loc539911</i>        | 168      | 110      | 311      | CB461411       | hypothetical LOC539911, transcript variant 4 (LOC539911), predicted       |



Supplemental Table S1

## Bovine Granulosa Cell Regulated Genes

|                  |          |          |          |                |                                                                              |
|------------------|----------|----------|----------|----------------|------------------------------------------------------------------------------|
| <i>Loc617312</i> | 208      | 409      | 138      | CK846089       | similar to centrosomal protein 72 kDa (LOC617312), predicted                 |
| <i>Mgc127874</i> | 533      | 925      | 343      | CK958497       | hypothetical LOC508617 (MGC127874), NM_001034325.1                           |
| <i>Loc504975</i> | 293      | 457      | 95       | CK775855       | similar to tolloid-like 2, transcript variant 1 (LOC504975), predicted       |
| <i>Loc539087</i> | 51       | 26       | 157      | CK775676       | hypothetical LOC539087, transcript variant 1 (LOC539087), predicted          |
| <i>Loc511970</i> | 53       | 89       | 27       | CK833514       | similar to CG5965-PA, transcript variant 6 (LOC511970), predicted            |
| <i>Loc511219</i> | 146      | 23       | 42       | CB429630       | hypothetical LOC511219 (LOC511219), predicted                                |
| <i>Loc533184</i> | 71       | 37       | 125      | CK770048       | similar to tweety 2 isoform 1 (LOC533184), predicted                         |
| <i>Loc508790</i> | 50       | 33       | 98       | CK770695       | similar to transmembrane protein induced by tumor necrosis factor alpha      |
| <i>Loc618286</i> | 49       | 83       | 12       | CK952023       | similar to TBC1 domain family, member 14 (LOC618286), predicted              |
| <i>Loc513551</i> | 46       | 110      | 70       | CK952083       | hypothetical LOC513551, predicted                                            |
| <b>Ests</b>      | <b>S</b> | <b>M</b> | <b>L</b> | <b>GenBank</b> | <b>Description</b>                                                           |
| ---              | 182      | 287      | 554      | CK846622       | Transcribed locus, strongly similar to NP_005070.1 tumor protein             |
| ---              | 153      | 258      | 502      | CB460448       | Transcribed locus                                                            |
| ---              | 284      | 481      | 1036     | CB450086       | Transcribed locus, moderately similar to XP_291663.3 lipase-like,            |
| ---              | 98       | 209      | 374      | CK846663       | Transcribed locus                                                            |
| ---              | 97       | 161      | 384      | CK948196       | Transcribed locus                                                            |
| ---              | 67       | 173      | 1087     | BP105987       | Transcribed locus                                                            |
| ---              | 73       | 116      | 215      | CK959800       | Transcribed locus                                                            |
| ---              | 69       | 155      | 291      | CK980839       | Transcribed locus                                                            |
| ---              | 61       | 101      | 237      | CB535138       | Transcribed locus                                                            |
| ---              | 66       | 186      | 1106     | CK947002       | Transcribed locus                                                            |
| ---              | 56       | 106      | 530      | CK848334       | Transcribed locus                                                            |
| ---              | 56       | 124      | 303      | CB425083       | Transcribed locus                                                            |
| ---              | 22       | 35       | 82       | AW670030       | Transcribed locus                                                            |
| ---              | 15       | 32       | 220      | BF440340       | Transcribed locus                                                            |
| ---              | 39       | 68       | 338      | BM251338       | Transcribed locus                                                            |
| ---              | 18       | 33       | 282      | BM255348       | Transcribed locus                                                            |
| ---              | 4        | 14       | 122      | BM366388       | Transcribed locus, weakly similar to NP_067004.3 SLAM family                 |
| ---              | 15       | 30       | 84       | BP102940       | Transcribed locus                                                            |
| ---              | 10       | 22       | 105      | CB421639       | Transcribed locus, moderately similar to XP_521353.1 similar to MGC16121     |
| ---              | 25       | 48       | 107      | CB433662       | Transcribed locus                                                            |
| ---              | 34       | 53       | 128      | CB452350       | Transcribed locus, moderately similar to XP_521353.1 similar to MGC16121     |
| ---              | 11       | 37       | 92       | CB459939       | ---                                                                          |
| ---              | 21       | 57       | 158      | CB464048       | Transcribed locus                                                            |
| ---              | 22       | 41       | 100      | CB465263       | Transcribed locus                                                            |
| ---              | 6        | 18       | 104      | CK729527       | Transcribed locus                                                            |
| ---              | 3        | 21       | 153      | CK769342       | Transcribed locus                                                            |
| ---              | 7        | 19       | 86       | CK769793       | Transcribed locus                                                            |
| ---              | 12       | 20       | 119      | CK978314       | Transcribed locus                                                            |
| ---              | 35       | 53       | 264      | CK773226       | Transcribed locus                                                            |
| ---              | 44       | 66       | 108      | CK848032       | Transcribed locus                                                            |
| ---              | 25       | 54       | 125      | CK960947       | Transcribed locus                                                            |
| ---              | 11       | 26       | 136      | CK957284       | Transcribed locus                                                            |
| ---              | 8        | 19       | 87       | CK961132       | Transcribed locus                                                            |
| ---              | 31       | 67       | 173      | CK773493       | Transcribed locus                                                            |
| ---              | 9        | 23       | 99       | CK778710       | Transcribed locus                                                            |
| ---              | 16       | 35       | 81       | CK950136       | Transcribed locus                                                            |
| ---              | 377      | 180      | 106      | CK973831       | Transcribed locus                                                            |
| ---              | 313      | 197      | 115      | CK975775       | Transcribed locus                                                            |
| ---              | 245      | 145      | 90       | CF930523       | Transcribed locus                                                            |
| ---              | 692      | 441      | 231      | AW481945       | Transcribed locus                                                            |
| ---              | 1567     | 521      | 269      | CK847032       | Transcribed locus                                                            |
| ---              | 314      | 164      | 103      | AV599401       | ---                                                                          |
| ---              | 575      | 355      | 195      | CK775474       | Transcribed locus, moderately similar to XP_488839.1                         |
| ---              | 794      | 311      | 201      | AV612255       | Transcribed locus                                                            |
| ---              | 269      | 172      | 113      | CK955739       | Transcribed locus, weakly similar to XP_529728.1 LOC453731 [Pan troglodytes] |
| ---              | 2078     | 1360     | 392      | BM483521       | Transcribed locus, moderately similar to XP_328828.1 Neurospora crassa       |
| ---              | 519      | 297      | 110      | CK957216       | Transcribed locus                                                            |
| ---              | 664      | 337      | 165      | CK769502       | Transcribed locus                                                            |
| ---              | 134      | 76       | 48       | CB421837       | Transcribed locus                                                            |
| ---              | 180      | 117      | 72       | CB421746       | Transcribed locus, weakly similar to XP_531051.1 LOC463585 [Pan troglodytes] |
| ---              | 162      | 81       | 29       | BP109863       | Transcribed locus                                                            |
| ---              | 134      | 79       | 51       | CB453664       | Transcribed locus                                                            |
| ---              | 171      | 111      | 62       | CB444243       | ---                                                                          |
| ---              | 186      | 105      | 58       | CB430887       | Transcribed locus                                                            |
| ---              | 81       | 51       | 33       | AV601907       | Transcribed locus, weakly similar to XP_529728.1 LOC453731 [Pan troglodytes] |
| ---              | 110      | 20       | 13       | AW307709       | Transcribed locus                                                            |
| ---              | 125      | 44       | 21       | BE752516       | Transcribed locus                                                            |
| ---              | 149      | 51       | 22       | BM107097       | Transcribed locus, weakly similar to XP_517689.1 adaptor-related protein     |
| ---              | 85       | 51       | 30       | BM287472       | Transcribed locus, strongly similar to XP_375848.2 KIAA0792 gene             |
| ---              | 150      | 56       | 33       | BP107025       | Transcribed locus                                                            |
| ---              | 81       | 43       | 20       | CB451852       | Transcribed locus                                                            |
| ---              | 107      | 54       | 35       | CB534769       | ---                                                                          |
| ---              | 106      | 55       | 32       | CK817083       | Transcribed locus                                                            |
| ---              | 139      | 72       | 43       | CK968818       | Transcribed locus                                                            |

Supplemental Table S1

## Bovine Granulosa Cell Regulated Genes

|     |      |     |      |                  |                                                                          |
|-----|------|-----|------|------------------|--------------------------------------------------------------------------|
| --- | 123  | 53  | 14   | CK954380         | Transcribed locus, strongly similar to NP_777619.1 hypothetical protein  |
| --- | 96   | 54  | 31   | CK950652         | Transcribed locus                                                        |
| --- | 97   | 63  | 17   | CK849085         | Transcribed locus                                                        |
| --- | 308  | 195 | 513  | AFFX-r2-Bs-thr-1 | ---                                                                      |
| --- | 155  | 93  | 233  | AFFX-LysX-3      | ---                                                                      |
| --- | 193  | 118 | 345  | AFFX-r2-Bs-phe-1 | ---                                                                      |
| --- | 304  | 188 | 502  | AFFX-ThrX-3      | ---                                                                      |
| --- | 437  | 245 | 663  | AFFX-r2-Bs-thr-3 | ---                                                                      |
| --- | 806  | 523 | 1228 | AFFX-r2-Bs-dap-1 | ---                                                                      |
| --- | 1016 | 662 | 1554 | AFFX-DapX-M      | ---                                                                      |
| --- | 258  | 423 | 159  | BE217509         | Transcribed locus, moderately similar to NP_003934.1 genethonin          |
| --- | 81   | 272 | 138  | CK975625         | Transcribed locus                                                        |
| --- | 210  | 880 | 423  | CK951444         | Transcribed locus, strongly similar to NP_694958.1 transmembrane protein |
| --- | 101  | 64  | 169  | CK776305         | Transcribed locus                                                        |
| --- | 108  | 67  | 169  | AFFX-LysX-M      | ---                                                                      |
| --- | 123  | 223 | 74   | CK961923         | ---                                                                      |
| --- | 82   | 135 | 40   | BM286259         | Transcribed locus                                                        |
| --- | 35   | 19  | 80   | AV597441         | Transcribed locus, moderately similar to NP_081019.1 RIKEN cDNA          |
| --- | 88   | 28  | 42   | BE758306         | Transcribed locus                                                        |
| --- | 259  | 26  | 40   | CB226640         | Transcribed locus                                                        |
| --- | 134  | 35  | 54   | CB451799         | Transcribed locus                                                        |
| --- | 10   | 6   | 86   | CB537957         | ---                                                                      |
| --- | 50   | 78  | 24   | CK849442         | Transcribed locus, weakly similar to NP_065140.1 Rhesus blood group      |
| --- | 107  | 20  | 71   | CK950562         | Transcribed locus                                                        |

Bolded genes are increased for all three antral follicle sizes.

Supplemental Table S2

## Bovine Theca Cell Regulated Genes

| Category/Gene Symbol          | Microarray Signal |      |      | Genbank     | Description                                                               |
|-------------------------------|-------------------|------|------|-------------|---------------------------------------------------------------------------|
| Cell Cycle                    | S                 | M    | Lg   |             |                                                                           |
| <b>Gadd45b</b>                | 343               | 534  | 961  | CK964359    | <b>growth arrest and DNA-damage-inducible, beta</b>                       |
| <i>Loc614739</i>              | 78                | 4    | 8    | CK771969    | similar to reprimo, TP53 dependant G2 arrest mediator                     |
| ---                           | 259               | 137  | 86   | CK967918    | Transcribed locus, moderately similar to NP_212132.1 dedicator of         |
| <b>Development</b>            | S                 | M    | Lg   | Genbank     | Description                                                               |
| <i>Mgc128098</i>              | 42                | 105  | 67   | CB456431    | similar to anterior pharynx defective 1a homolog                          |
| ---                           | 172               | 105  | 25   | CK777690    | Transcribed locus, strongly similar to NP_061928.4 roundabout homolog     |
| ---                           | 121               | 37   | 203  | CK948890    | Transcribed locus, moderately similar to NP_114433.1 regenerating         |
| <b>Ecm &amp; Cytoskeleton</b> | S                 | M    | Lg   | Genbank     | Description                                                               |
| <b>Loc514273</b>              | 27                | 52   | 112  | CK965841    | <b>similar to amphoterin induced gene 2 (LOC514273)</b>                   |
| <b>Mgc128478</b>              | 24                | 67   | 154  | BF076836    | <b>similar to claudin 11 (MGC128478), NM_001035055.1</b>                  |
| <b>Tnfaip6</b>                | 10                | 39   | 650  | CB442867    | <b>Tumor necrosis factor, alpha-induced protein 6</b>                     |
| ---                           | 45                | 68   | 125  | BE722311    | <b>Transcribed locus, strongly similar to NP_002282.1 laminin, beta 1</b> |
| <i>Bgn</i>                    | 488               | 272  | 178  | NM_178318.2 | biglycan                                                                  |
| <i>Col18a1</i>                | 1173              | 619  | 203  | CK773859    | Collagen, type XVIII, alpha 1                                             |
| <i>Loc512343</i>              | 553               | 252  | 126  | BE482398    | similar to alpha 1 type XVI collagen precursor                            |
| <i>Loc512343</i>              | 1723              | 829  | 397  | BE482398    | similar to alpha 1 type XVI collagen precursor                            |
| <i>Loc513668</i>              | 872               | 378  | 157  | AV617451    | similar to collagen, type XXVII, alpha 1                                  |
| <i>Loc513668</i>              | 120               | 79   | 19   | BE237617    | similar to collagen, type XXVII, alpha 1                                  |
| <i>Loc537532</i>              | 497               | 328  | 84   | CK833035    | similar to alpha 1 type XV collagen precursor                             |
| <i>Magp2</i>                  | 58                | 545  | 169  | NM_174386.2 | microfibril-associated glycoprotein-2                                     |
| <i>Tnnt1</i>                  | 211               | 92   | 580  | NM_174474.1 | troponin T1, skeletal, slow                                               |
| ---                           | 95                | 146  | 55   | CB436656    | Transcribed locus, strongly similar to NP_005564.1 lamin B1               |
| ---                           | 1980              | 1051 | 364  | BE758040    | Transcribed locus, weakly similar to NP_000486.1 collagen,                |
| <b>Electron Transport</b>     | S                 | M    | Lg   | Genbank     | Description                                                               |
| <b>Maob</b>                   | 34                | 82   | 208  | NM_177944.1 | <b>monoamine oxidase B</b>                                                |
| <b>Golgi Apparatus</b>        | S                 | M    | Lg   | Genbank     | Description                                                               |
| <i>Loc510504</i>              | 76                | 42   | 11   | CK940736    | similar to glycosyltransferase-like 1B transcript variant 2               |
| <i>Mgat4a</i>                 | 419               | 251  | 108  | CK849000    | Mannosyl (alpha-1,3-)-glycoprotein beta-1,4-                              |
| <i>Cip-1</i>                  | 27                | 107  | 42   | CK849654    | Chitinase-like protein 1 (CLP-1)                                          |
| <i>Loc511430</i>              | 76                | 18   | 7    | CK773758    | similar to Mucin-13 precursor                                             |
| <b>Growth Factors</b>         | S                 | M    | Lg   | Genbank     | Description                                                               |
| <b>Ccl2</b>                   | 83                | 159  | 252  | NM_174006.2 | <b>chemokine (C-C motif) ligand 2</b>                                     |
| <i>Spp1</i>                   | 55                | 129  | 674  | NM_174187.2 | <b>secreted phosphoprotein 1 [osteopontin, bone sialoprotein I,</b>       |
| <b>Xcl1</b>                   | 269               | 855  | 1606 | NM_175716.2 | <b>chemokine (C motif) ligand 1</b>                                       |
| <b>Ang</b>                    | 93                | 269  | 501  | NM_173891.1 | <b>angiogenin</b>                                                         |
| <i>Loc508666</i>              | 1193              | 697  | 2794 | CB465019    | similar to Small inducible cytokine A23 precursor (CCL23)                 |
| <i>Loc614833</i>              | 160               | 95   | 45   | CK772942    | similar to EGF-like-domain, multiple 7 (LOC614833)                        |
| ---                           | 118               | 77   | 28   | CB431697    | Transcribed locus, moderately similar to XP_524353.1                      |
| <b>Immune Response</b>        | S                 | M    | Lg   | Genbank     | Description                                                               |
| <b>F3</b>                     | 17                | 37   | 108  | NM_173878.2 | <b>coagulation factor III [thromboplastin, tissue factor]</b>             |
| <b>Loc509597</b>              | 46                | 71   | 152  | AB008623.1  | <b>similar to HLA class I histocompatibility antigen</b>                  |
| <i>Loc404109</i>              | 56                | 167  | 102  | CK973343    | IgG2a heavy chain constant region                                         |
| <i>Loc505478</i>              | 129               | 465  | 232  | CK977367    | similar to Immunoglobulin lambda-like polypeptide                         |
| <i>Loc507549</i>              | 50                | 32   | 79   | CK771045    | similar to T-cell immunoglobulin and mucin domain                         |
| <i>Loc512972</i>              | 81                | 48   | 24   | CB531703    | similar to minor histocompatibility antigen HA-1 (LOC512972)              |
| <i>Loc528593</i>              | 12                | 2    | 80   | CB426639    | similar to CD5 antigen-like (LOC528593), predicted                        |
| <i>Loc617435</i>              | 239               | 144  | 392  | CB435760    | similar to complement component 1, q subcomponent                         |
| <i>Mgc128080</i>              | 170               | 104  | 39   | BP107529    | similar to CD200 antigen isoform a precursor                              |
| ---                           | 119               | 37   | 70   | CB165744    | Transcribed locus, weakly similar to NP_002107.3 major                    |
| <b>Hormones</b>               | S                 | M    | Lg   | Genbank     | Description                                                               |
| <b>Oxt</b>                    | 38                | 70   | 353  | NM_176855.1 | <b>oxytocin</b>                                                           |
| <b>Pthlh</b>                  | 23                | 77   | 128  | NM_174753.1 | <b>parathyroid hormone-like hormone</b>                                   |
| <b>Bcar3</b>                  | 93                | 156  | 244  | CK770175    | <b>breast cancer antiestrogen resistance 3</b>                            |
| <b>Inhba</b>                  | 153               | 1901 | 4189 | NM_174363.1 | <b>inhibin, beta A (activin A, activin AB alpha polypeptide)</b>          |
| <b>Metabolism</b>             | S                 | M    | Lg   | Genbank     | Description                                                               |
| <b>Art3</b>                   | 19                | 31   | 104  | BM256348    | <b>mono (ADP-ribosyl)transferase</b>                                      |
| <b>Bcat2</b>                  | 260               | 394  | 765  | CK951109    | <b>branched chain aminotransferase 2, mitochondrial</b>                   |
| <b>Ca2</b>                    | 38                | 89   | 263  | NM_178572.2 | <b>carbonic anhydrase II</b>                                              |
| <b>Clic4</b>                  | 426               | 759  | 1144 | BP104059    | <b>Chloride intracellular channel 4</b>                                   |
| <b>Fdft1</b>                  | 99                | 237  | 466  | CK982401    | <b>farnesyl-diphosphate farnesyltransferase 1</b>                         |
| <b>Gpt</b>                    | 70                | 106  | 251  | CK772830    | <b>glutamic-pyruvate transaminase (GPT), predicted</b>                    |
| <b>Idh1</b>                   | 201               | 545  | 911  | NM_181012.2 | <b>isocitrate dehydrogenase 1 (NADP+), soluble</b>                        |
| <b>Idh3a</b>                  | 192               | 336  | 829  | NM_174644.2 | <b>isocitrate dehydrogenase 3 (NAD+) alpha (IDH3A)</b>                    |
| <i>Loc407176</i>              | 28                | 44   | 77   | L26101.1    | <b>calcium activated potassium channel beta subunit</b>                   |
| <i>Loc505394</i>              | 8                 | 12   | 308  | CB530133    | similar to Apolipoprotein A-II precursor (Apo-AII)                        |
| <i>Loc505472</i>              | 157               | 276  | 446  | CK959696    | similar to liver glycogen phosphorylase                                   |

## Bovine Theca Cell Regulated Genes

|                        |      |      |      |             |                                                                           |
|------------------------|------|------|------|-------------|---------------------------------------------------------------------------|
| <i>Loc505472</i>       | 165  | 321  | 501  | CK977645    | similar to liver glycogen phosphorylase                                   |
| <i>Loc509696</i>       | 69   | 115  | 195  | CK970946    | similar to trans-prenyltransferase                                        |
| <i>Loc511053</i>       | 30   | 50   | 92   | CK770053    | similar to solute carrier family 27 member 3                              |
| <i>Loc513376</i>       | 38   | 72   | 166  | BI539693    | similar to Genethonin 1 (GENX-3414)                                       |
| <i>Loc532778</i>       | 864  | 1425 | 2500 | CK969786    | similar to ADP-ribosylation factor GTPase activating                      |
| <i>Loc533186</i>       | 35   | 59   | 89   | BE237450    | similar to citrate lyase beta like                                        |
| <i>Loc540923</i>       | 43   | 71   | 122  | BF652540    | similar to plasma glutamate carboxypeptidase                              |
| <i>Mgc:129011</i>      | 143  | 247  | 409  | CK848365    | similar to Sulfite oxidase, mitochondrial precursor                       |
| <i>Oas1</i>            | 178  | 292  | 592  | CK960499    | 2'-5'-oligoadenylate synthetase 1 (OAS1), NM_178108                       |
| <i>Rgn</i>             | 67   | 104  | 783  | NM_173957.2 | regucalcin (senescence marker protein-30)                                 |
| <i>Peg3</i>            | 1239 | 575  | 339  | CB429880    | paternally expressed gene 3                                               |
| <i>Ton2</i>            | 522  | 292  | 191  | BM364701    | Transcobalamin II; macrocytic anemia                                      |
| <i>Mest</i>            | 616  | 280  | 139  | CK773236    | Mesoderm-specific transcript                                              |
|                        | 343  | 227  | 131  | BP108175    | Transcribed locus, strongly similar to NP_066188.1 amylase                |
| <i>Kdr</i>             | 227  | 121  | 59   | CB426507    | Kinase insert domain receptor (a type III receptor tyrosine kinase)       |
| <i>Loc515013</i>       | 91   | 55   | 35   | CK769953    | similar to secernin 2, (LOC515013), predicted                             |
| ---                    | 161  | 80   | 31   | CB420635    | Transcribed locus, weakly similar to NP_877585.1 IQ motif                 |
| <i>Loc510299</i>       | 101  | 63   | 29   | BG689826    | similar to cytoglobin (LOC510299), predicted                              |
| <i>Loc514194</i>       | 106  | 49   | 14   | BM362809    | similar to Ceruloplasmin precursor (Ferroxidase)                          |
| <i>Scg2</i>            | 328  | 210  | 2612 | NM_174176.2 | secretogranin II (chromogranin C)                                         |
| <i>Tf</i>              | 168  | 51   | 362  | NM_177484.2 | transferrin                                                               |
| <i>Loc505315</i>       | 35   | 18   | 104  | CK848241    | similar to T12A2.1 (LOC505315), predicted                                 |
| <i>Pgdh</i>            | 214  | 324  | 99   | CF764344    | hydroxyprostaglandin dehydrogenase 15-(NAD)                               |
| <i>Mgc127515</i>       | 46   | 147  | 96   | CB446157    | similar to transmembrane 4 superfamily member                             |
| <i>Loc507503</i>       | 63   | 142  | 94   | CK772874    | similar to THAP domain protein 4 (LOC507503)                              |
| <i>Mgc127657</i>       | 28   | 99   | 43   | CK461257    | similar to plasmalemma vesicle associated protein                         |
| <i>Aqp1</i>            | 47   | 126  | 30   | NM_174702.2 | aquaporin 1                                                               |
| <b>Protease</b>        | S    | M    | Lg   | Genbank     | Description                                                               |
| <i>Loc613577</i>       | 896  | 1409 | 2122 | CK848260    | similar to homocysteine-inducible, endoplasmic reticulum                  |
| <i>Serpib2</i>         | 71   | 519  | 1627 | AF146234.1  | serine (or cysteine) proteinase inhibitor, clade B (ovalbumin), member 2  |
| <i>Serpine1</i>        | 64   | 285  | 474  | NM_174137.2 | serine (or cysteine) proteinase inhibitor, clade E                        |
| <i>Loc514813</i>       | 102  | 274  | 174  | CB456244    | similar to ubiquitin specific protease 7 (herpes virus-associated)        |
| <b>Receptors</b>       | S    | M    | Lg   | Genbank     | Description                                                               |
| <i>IL4r</i>            | 30   | 48   | 80   | AV666299    | interleukin-4 receptor alpha chain,(IL4R), predicted                      |
|                        | 720  | 339  | 144  | CB421632    | Transcribed locus, moderately similar to NP_058934.1                      |
| <i>Loc507783</i>       | 229  | 136  | 46   | AV603307    | similar to Parathyroid hormone/parathyroid hormone-related                |
| <i>Loc512018</i>       | 76   | 49   | 33   | CK774341    | similar to brother of CDO (LOC512018), predicted                          |
| <i>Loc527140</i>       | 57   | 97   | 34   | CF931289    | similar to Calcitonin gene-related peptide type 1 receptor                |
| <b>Signaling</b>       | S    | M    | Lg   | Genbank     | Description                                                               |
| <i>Loc515156</i>       | 56   | 88   | 133  | CB424830    | similar to Six transmembrane epithelial antigen of prostate 1             |
| <i>Loc533562</i>       | 20   | 64   | 100  | CB419946    | similar to Transmembrane 9 superfamily protein member 4                   |
| <i>Loc538437</i>       | 327  | 522  | 1115 | CB170392    | similar to GTP-binding protein GEM (GTP-binding mitogen-induced           |
| <i>Cryab</i>           | 53   | 103  | 203  | NM_174290.2 | crystallin, alpha polypeptide 2                                           |
| <i>Isg15</i>           | 169  | 260  | 437  | NM_174366.1 | interferon-stimulated protein, 15 kDa                                     |
| <i>Loc516303</i>       | 28   | 66   | 104  | CB456788    | similar to mitogen-inducible gene 6 protein (LOC516303), predicted        |
| <i>Loc534658</i>       | 27   | 55   | 92   | CK941373    | similar to WNT1 inducible signaling pathway protein 2 precursor           |
| <i>Loc613697</i>       | 51   | 113  | 178  | BI682659    | similar to Rho GTPase activating protein 10 (LOC613697), predicted        |
| <i>Lrp8</i>            | 5    | 70   | 348  | CB166058    | low density lipoprotein receptor-related protein 8                        |
| <i>Mgc128138</i>       | 25   | 61   | 278  | CF614403    | similar to cardiac ankyrin repeat protein (MGC128138)                     |
| <i>Olr1</i>            | 23   | 107  | 346  | NM_174132.2 | oxidised low density lipoprotein (lectin-like) receptor 1                 |
| <i>Pik3r1</i>          | 20   | 84   | 194  | NM_174575.1 | phosphoinositide-3-kinase, regulatory subunit, polypeptide 1              |
| ---                    | 38   | 62   | 105  | CK775786    | Transcribed locus, strongly similar to NP_055104.2 calpain 6              |
|                        | 335  | 598  | 938  | CK770721    | Transcribed locus, strongly similar to XP_523795.1                        |
| <i>Lec3</i>            | 77   | 34   | 19   | CB534322    | Latrophilin 3                                                             |
| <i>Loc525795</i>       | 500  | 316  | 142  | BE752701    | similar to agrin (LOC525795), predicted                                   |
| <i>Loc540153</i>       | 140  | 80   | 46   | CB426404    | similar to tensin like C1 domain containing phosphatase isoform 2         |
| <i>Loc613547</i>       | 213  | 105  | 44   | CB456927    | similar to receptor (calcitonin) activity modifying protein 3,            |
| <i>Mgc128924</i>       | 116  | 72   | 31   | CK774019    | similar to ankyrin repeat and SOCS box-containing protein 2 (predicted)   |
| <i>Loc538507</i>       | 99   | 56   | 36   | CB423270    | similar to Frizzled 2 precursor (Frizzled-2) (Fz-2) (hFz2) (FzE2)         |
| <i>Loc616055</i>       | 141  | 85   | 50   | CB456064    | similar to Ran GTPase-activating protein 1, transcript variant 3          |
| <i>Tm7sf2</i>          | 96   | 33   | 204  | NM_174622.2 | transmembrane 7 superfamily member 2                                      |
| <i>Loc504437</i>       | 24   | 82   | 46   | CK978780    | similar to Serine/threonine-protein kinase 6 (Serine/threonine kinase 15) |
| <i>Loc514787</i>       | 144  | 84   | 230  | CB427601    | similar to serine/threonine kinase 38 like, transcript variant 1          |
| <i>Aurkb</i>           | 64   | 109  | 40   | CB538063    | Aurora kinase B                                                           |
| <i>Loc521162</i>       | 19   | 116  | 45   | CK778554    | similar to Slit homolog 2 protein precursor (Slit-2)                      |
| <i>Loc533332</i>       | 48   | 91   | 30   | CF765405    | similar to RAB38 (LOC533332), predicted                                   |
| <i>Mgc128911</i>       | 55   | 475  | 212  | CK848780    | similar to secreted frizzled-related protein 2 precursor (MGC128911)      |
| <i>Rfrp</i>            | 32   | 240  | 130  | NM_174168.1 | RFamide-related peptide precursor                                         |
| <b>Steroidogenesis</b> | S    | M    | Lg   | Genbank     | Description                                                               |
| <i>Cyp19</i>           | 37   | 548  | 2956 | NM_174305.1 | cytochrome P450, family XIX (conversion of androgen to estrogen)          |

## Bovine Theca Cell Regulated Genes

| Transcription    | S    | M    | Lg   | Genbank     | Description                                                              |
|------------------|------|------|------|-------------|--------------------------------------------------------------------------|
| <i>Loc614673</i> | 103  | 162  | 260  | CK848830    | similar to Nuclear protein 1 (Protein p8) (Candidate of metastasis 1)    |
| <i>Bhlhb2</i>    | 34   | 102  | 231  | CB167431    | differentiated embryo chondrocyte expressed gene 1 (BHLHB2)              |
| <i>Cited1</i>    | 85   | 156  | 619  | AF362075.1  | transactivator, with Glu/Asp-rich carboxy-terminal domain, 1             |
| <i>Eif4e</i>     | 21   | 37   | 78   | CB427688    | eukaryotic translation initiation factor 4E (EIF4E)                      |
| <i>Fos</i>       | 102  | 189  | 339  | NM_182786.1 | murine FBJ osteosarcoma viral (v-fos) oncogene homolog                   |
| <i>Loc505549</i> | 31   | 53   | 80   | AW461342    | similar to PHD finger protein 22 (LOC505549), predicted                  |
| <i>Loc511939</i> | 47   | 83   | 131  | AW482178    | similar to Pirin, transcript variant 3 (LOC511939), predicted            |
| <i>Loc525888</i> | 56   | 105  | 354  | BE217422    | similar to thymus high mobility group box protein TOX                    |
| <i>Loc541305</i> | 68   | 102  | 226  | BI680153    | similar to nuclear receptor subfamily 5, group A, member 2 isoform 2     |
| <i>Loc617269</i> | 48   | 80   | 129  | CF615274    | similar to ankyrin repeat and SOCS box-containing 8 (                    |
| <i>Zfp36</i>     | 93   | 160  | 285  | NM_174493.1 | zinc finger protein homologous to Zfp-36 in mouse                        |
| <i>Loc506470</i> | 274  | 177  | 97   | CK776908    | similar to Transcription factor COE4 (Early B-cell factor 4)             |
| <i>Loc510013</i> | 644  | 420  | 210  | CK776799    | similar to nuclear receptor co-repressor 2 (LOC510013), predicted        |
| <i>Loc515303</i> | 207  | 122  | 73   | BE236505    | similar to HMG-box transcription factor TCF-3 (LOC515303), predicted     |
| <i>Loc527574</i> | 260  | 166  | 107  | CK770186    | similar to sal-like 2 (LOC527574), predicted                             |
| <i>Loc532209</i> | 105  | 63   | 36   | CK776496    | similar to ecotropic viral integration site 1 (LOC532209), predicted     |
| <i>Loc540142</i> | 104  | 46   | 8    | CK776938    | similar to forkhead-like 18 (LOC540142), predicted                       |
| <i>Loc540251</i> | 81   | 48   | 21   | BM481287    | similar to homeo box D10 (LOC540251), predicted                          |
| <i>Xist</i>      | 1088 | 682  | 319  | CK848330    | X (inactive)-specific transcript (XIST) on chromosome X                  |
| <i>Loc504585</i> | 117  | 210  | 73   | CK774460    | similar to Sperm-associated antigen 5 (Astrin) (Mitotic spindle          |
| <i>Loc514918</i> | 132  | 48   | 87   | CK982002    | similar to GC-rich sequence DNA-binding factor homolog                   |
| <i>Loc538474</i> | 63   | 103  | 42   | CK966337    | similar to Nuclear factor 1 B-type (Nuclear factor 1/B)                  |
| <i>Loc541088</i> | 50   | 133  | 79   | CB444034    | similar to BCoR protein (BCL-6 corepressor), transcript variant 3        |
| <i>Loc617976</i> | 195  | 293  | 101  | CB533092    | similar to LIM domain binding 2 (LOC617976), predicted                   |
| Translation      | S    | M    | Lg   | Genbank     | Description                                                              |
| <i>18s Rrna</i>  | 1576 | 252  | 92   | 5823437     | 18S ribosomal RNA gene                                                   |
| <i>Mtif2</i>     | 76   | 27   | 44   | CB444297    | mitochondrial translational initiation factor 2 (MTIF2)                  |
| ---              | 69   | 26   | 135  | CK774193    | Transcribed locus, weakly similar to XP_484324.1                         |
| Misc             | S    | M    | Lg   | Genbank     | Description                                                              |
| <i>Peg3</i>      | 343  | 198  | 85   | AW461515    | paternally expressed gene 3                                              |
| <i>Ahsg</i>      | 40   | 8    | 89   | CB537901    | alpha-2-HS-glycoprotein                                                  |
| Unknown Function | S    | M    | Lg   | Genbank     | Description                                                              |
| <i>16-Jun</i>    | 430  | 838  | 1558 | CB461321    | similar to putative 6-16 protein, transcript variant 1 (6-16), predicted |
| <i>Loc505854</i> | 538  | 827  | 1426 | CK970588    | similar to Protein C10orf57 homolog,(LOC505854), predicted               |
| <i>Loc508699</i> | 71   | 113  | 173  | CB450089    | hypothetical protein LOC508699 (LOC508699), NM_001031754.1               |
| <i>Loc511583</i> | 93   | 192  | 417  | CK941057    | hypothetical LOC511583 (LOC511583), predicted                            |
| <i>Loc513234</i> | 142  | 329  | 1017 | CK778634    | similar to ovary-specific acidic protein (LOC513234), predicted          |
| <i>Loc529235</i> | 593  | 904  | 1968 | CK846550    | similar to RTP801, transcript variant 1 (LOC529235), predicted           |
| <i>Loc539199</i> | 30   | 46   | 96   | CK773180    | similar to MAM domain containing 2 (LOC539199), predicted                |
| <i>Mgc128138</i> | 103  | 202  | 949  | CB168998    | similar to cardiac ankyrin repeat protein (MGC128138)                    |
| <i>Mgc128158</i> | 26   | 95   | 150  | AV605192    | similar to optineurin (MGC128158), NM_001034602.1                        |
| <i>Plap-1</i>    | 188  | 523  | 829  | CF765170    | similar to Asporin precursor                                             |
| <i>Cath5</i>     | 168  | 35   | 10   | NM_174510.2 | cathelicidin 5                                                           |
| <i>Loc504245</i> | 115  | 69   | 40   | CB425779    | similar to nadrin isoform 1 (LOC504245), predicted                       |
| <i>Loc504741</i> | 603  | 317  | 198  | CK728198    | similar to collectin sub-family member 12 isoform II                     |
| <i>Loc509964</i> | 82   | 52   | 20   | CB468388    | similar to ankyrin repeat domain 47 (LOC509964), predicted               |
| <i>Loc510926</i> | 677  | 437  | 264  | AW658522    | hypothetical LOC510926                                                   |
| <i>Loc515133</i> | 941  | 324  | 186  | CK776308    | similar to esophageal cancer related gene 4 protein                      |
| <i>Loc518495</i> | 194  | 111  | 53   | CB438670    | similar to Apolipoprotein-L3 (Apolipoprotein L-III) (ApoL-III)           |
| <i>Loc616994</i> | 157  | 64   | 40   | CB430275    | similar to leucine rich repeat (in FLII) interacting protein 1           |
| <i>Loc507172</i> | 117  | 199  | 56   | CB426994    | hypothetical LOC507172 (LOC507172), predicted                            |
| <i>Loc507432</i> | 32   | 156  | 95   | AV599674    | similar to microtubule-associated protein 1 light chain 3 gamma          |
| <i>Loc508175</i> | 82   | 263  | 139  | BM088163    | similar to Plexin B2 precursor (MM1), (LOC508175), predicted             |
| <i>Loc508562</i> | 205  | 120  | 315  | BI848980    | similar to CG14120-PA (LOC508562), predicted                             |
| <i>Loc513195</i> | 51   | 87   | 34   | CK769492    | hypothetical LOC513195, predicted                                        |
| <i>Loc514940</i> | 3115 | 1132 | 1803 | CK779293    | similar to influenza virus NS1A binding protein isoform 2                |
| <i>Loc515235</i> | 25   | 88   | 52   | AV665925    | similar to steroid-sensitive protein 1, (LOC515235), predicted           |
| <i>Loc515676</i> | 312  | 170  | 657  | CK973550    | similar to CG33196-PB (LOC515676), predicted                             |
| <i>Loc521424</i> | 120  | 200  | 65   | CK973730    | similar to Epithelial membrane protein 1 (EMP-1)                         |
| <i>Mgc127998</i> | 53   | 20   | 207  | CB456384    | similar to Calmegin precursor (MGC127998), NM_001034205.1                |
| <i>Mgc127998</i> | 75   | 26   | 209  | CB531852    | similar to Calmegin precursor (MGC127998), NM_001034205.1                |
| Ests             | S    | M    | Lg   | Genbank     | Description                                                              |
| ---              | 159  | 300  | 457  | CK771023    | Transcribed locus, moderately similar to NP_775149.1                     |
| ---              | 69   | 119  | 182  | CK772599    | Transcribed locus                                                        |
| ---              | 151  | 249  | 423  | CK948835    | Transcribed locus                                                        |
| ---              | 54   | 92   | 183  | CK772076    | Transcribed locus, moderately similar to NP_997259.1                     |
| ---              | 72   | 115  | 196  | CB452156    | Transcribed locus, strongly similar to NP_080943.2                       |
| ---              | 27   | 83   | 127  | CB537905    | ---                                                                      |
| ---              | 67   | 108  | 183  | CB466824    | ---                                                                      |
| ---              | 98   | 1937 | 3291 | CK773598    | Transcribed locus                                                        |

Supplemental Table S2

## Bovine Theca Cell Regulated Genes

|     |      |      |      |                 |                                                                     |
|-----|------|------|------|-----------------|---------------------------------------------------------------------|
| --- | 96   | 190  | 333  | <b>CK778134</b> | Transcribed locus, strongly similar to XP_059689.3                  |
| --- | 86   | 141  | 294  | <b>CK774867</b> | Transcribed locus                                                   |
| --- | 53   | 94   | 156  | <b>CK974214</b> | Transcribed locus                                                   |
| --- | 99   | 204  | 368  | <b>CK846849</b> | Transcribed locus                                                   |
| --- | 72   | 150  | 287  | <b>CK970634</b> | Transcribed locus                                                   |
| --- | 59   | 144  | 311  | <b>BE217509</b> | Transcribed locus, moderately similar to NP_003934.1                |
| --- | 66   | 119  | 244  | <b>BI540104</b> | Transcribed locus                                                   |
| --- | 37   | 62   | 101  | <b>BI540137</b> | ---                                                                 |
| --- | 261  | 166  | 106  | CK955810        | Transcribed locus, moderately similar to NP_036271.1                |
| --- | 122  | 77   | 40   | CA035817        | Transcribed locus                                                   |
| --- | 86   | 47   | 23   | CB170964        | Transcribed locus                                                   |
| --- | 107  | 52   | 30   | CB437846        | Transcribed locus                                                   |
| --- | 203  | 111  | 67   | CB431739        | Transcribed locus                                                   |
| --- | 109  | 51   | 33   | CB430887        | Transcribed locus                                                   |
| --- | 106  | 49   | 33   | CB533238        | ---                                                                 |
| --- | 266  | 162  | 106  | CK773136        | Transcribed locus, weakly similar to XP_328828.1                    |
| --- | 274  | 176  | 106  | CB531827        | Transcribed locus                                                   |
| --- | 1842 | 1070 | 615  | <b>BF603163</b> | Transcribed locus                                                   |
| --- | 120  | 63   | 32   | CB445425        | ---                                                                 |
| --- | 110  | 65   | 30   | AW425901        | Transcribed locus                                                   |
| --- | 282  | 143  | 93   | BE808552        | Transcribed locus                                                   |
| --- | 157  | 101  | 56   | CK848002        | Transcribed locus, moderately similar to XP_510678.1                |
| --- | 152  | 41   | 16   | CA923335        | Transcribed locus                                                   |
| --- | 315  | 110  | 68   | CB421639        | Transcribed locus, moderately similar to XP_521353.1                |
| --- | 227  | 136  | 85   | BI541767        | Transcribed locus, strongly similar to XP_232372.2                  |
| --- | 214  | 128  | 79   | BF601695        | Transcribed locus, moderately similar to XP_223730.2                |
| --- | 141  | 87   | 43   | CK773285        | Transcribed locus                                                   |
| --- | 458  | 277  | 145  | CK729536        | Transcribed locus                                                   |
| --- | 80   | 39   | 25   | CK769590        | Transcribed locus, strongly similar to XP_375469.1 ProSAPI2         |
| --- | 116  | 74   | 40   | CK777757        | ---                                                                 |
| --- | 126  | 61   | 34   | CK776385        | Transcribed locus                                                   |
| --- | 115  | 61   | 32   | AV616558        | Transcribed locus, weakly similar to NP_277055.1 chromosome 19      |
| --- | 111  | 71   | 35   | CK769253        | Transcribed locus                                                   |
| --- | 117  | 71   | 34   | CK770333        | Transcribed locus, strongly similar to NP_598684.2 RIKEN cDNA       |
| --- | 288  | 156  | 93   | CB446249        | Transcribed locus                                                   |
| --- | 142  | 71   | 36   | CK952296        | Transcribed locus                                                   |
| --- | 75   | 30   | 18   | CB456691        | Transcribed locus                                                   |
| --- | 136  | 79   | 41   | AV616245        | ---                                                                 |
| --- | 353  | 198  | 124  | BE683785        | Transcribed locus                                                   |
| --- | 444  | 284  | 135  | BE663820        | Transcribed locus                                                   |
| --- | 110  | 71   | 20   | BF046170        | Transcribed locus                                                   |
| --- | 163  | 89   | 40   | AV617450        | Transcribed locus                                                   |
| --- | 187  | 55   | 110  | CB536259        | Transcribed locus                                                   |
| --- | 163  | 66   | 101  | CK831507        | Transcribed locus                                                   |
| --- | 92   | 23   | 46   | AU276024        | Transcribed locus                                                   |
| --- | 58   | 37   | 92   | CK944968        | Transcribed locus                                                   |
| --- | 239  | 367  | 132  | CK772779        | ---                                                                 |
| --- | 175  | 39   | 68   | CB461365        | Transcribed locus                                                   |
| --- | 54   | 112  | 34   | CK846762        | Transcribed locus                                                   |
| --- | 665  | 418  | 1149 | CK944387        | Transcribed locus                                                   |
| --- | 206  | 69   | 116  | CB433831        | Transcribed locus                                                   |
| --- | 204  | 129  | 328  | CB170513        | Transcribed locus                                                   |
| --- | 219  | 78   | 141  | CK975790        | Transcribed locus                                                   |
| --- | 140  | 42   | 72   | CB466120        | Transcribed locus                                                   |
| --- | 134  | 50   | 82   | BI536928        | Transcribed locus                                                   |
| --- | 2076 | 577  | 1196 | CB165272        | Transcribed locus, strongly similar to NP_008917.2 melanoma antigen |

Bolded genes are increased for all three antral follicle sizes (S<M<L).
